# Supplementary material for: Disrupting cell wall integrity impacts endomembrane trafficking to promote secretion over endocytic trafficking
Source: PubMed Central journal article supplement — J Exp Bot. 2024 Apr 27;75(12):3731–47. doi: 10.1093/jxb/erae195 (PMC11194303; doi:10.1093/jxb/erae195), 2024-04-27
Supplement: erae195_suppl_supplementary_figures_s1-s15_table_s1.pdf [file erae195_suppl_supplementary_figures_s1-s15_table_s1.pdf]

A

6-day-old Col-0 seedlings  
Incubate in 1/2 MS + 1% suc + 600 nM ISX

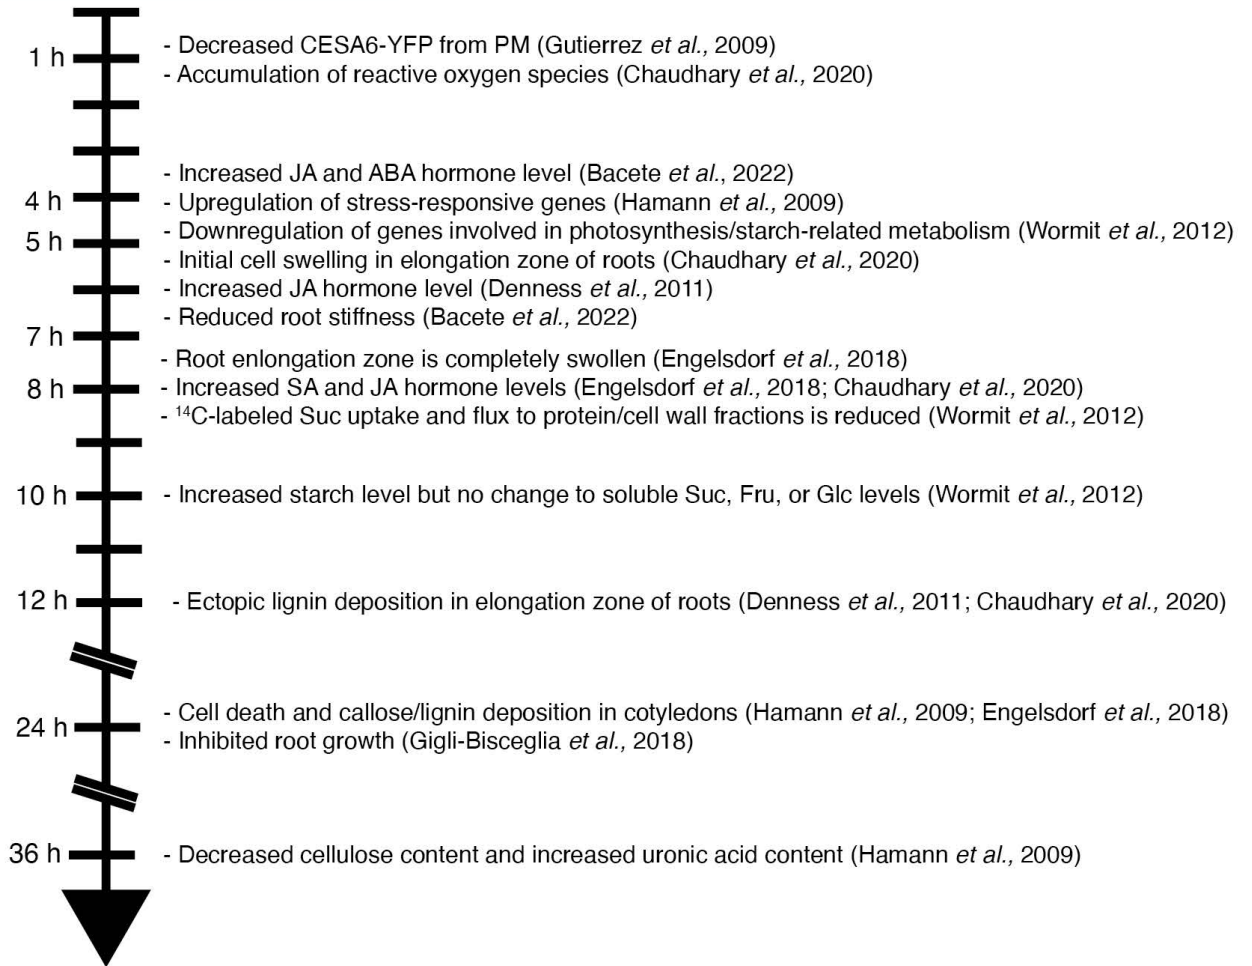

B

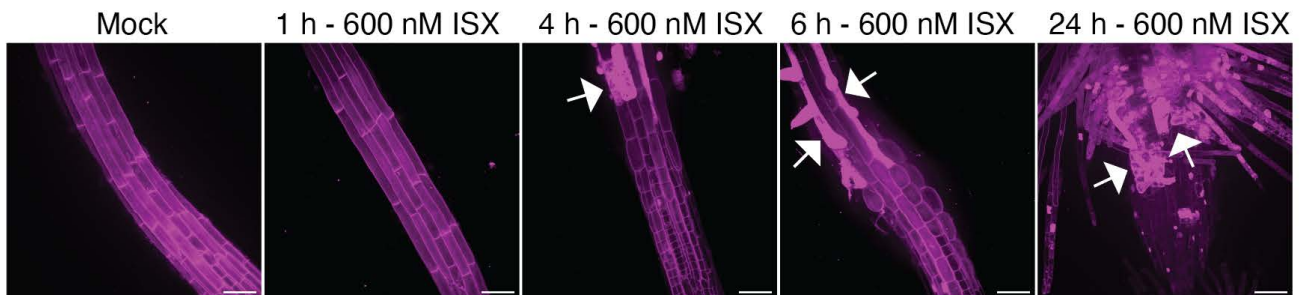

C

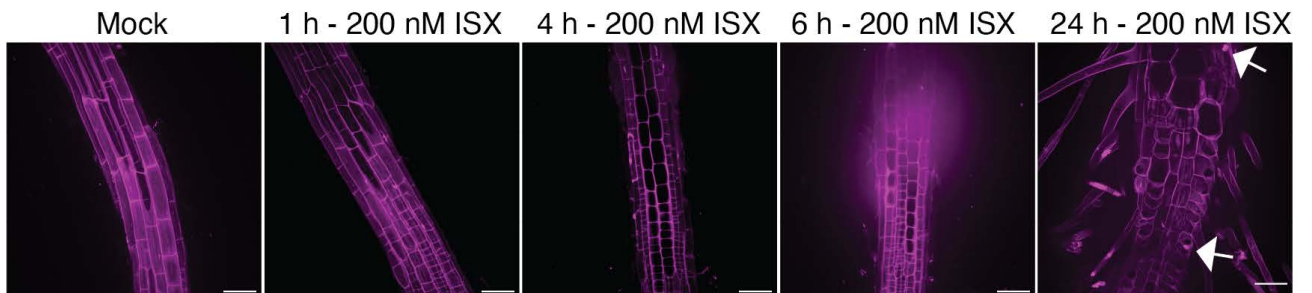

Fig. S1. Summary of previous research examining short-term impact of ISX on Arabidopsis seedlings. **A)** These studies tracked the cellular and molecular effects following transfer of 6-day-old Col-0 seedlings to  $\frac{1}{2}$  MS + 1% (w/v) sucrose + 600 nM ISX over the span of 36 h. **B)** Maximum-projection images of PI staining of 5-day-old Col-0 roots treated with 600 nM ISX over 24 h. **C)** Maximum-projection images of PI staining of 5-day-old Col-0 roots treated with 200 nM ISX over 24 h. White arrows indicate intracellular PI staining, an indicator of cell death. Scale bars are 50  $\mu$ m.

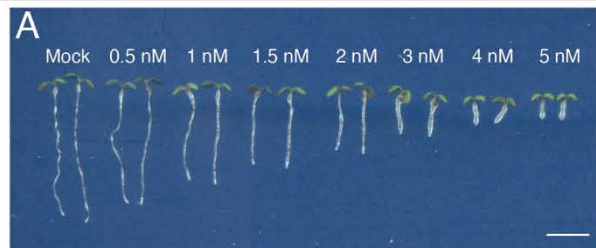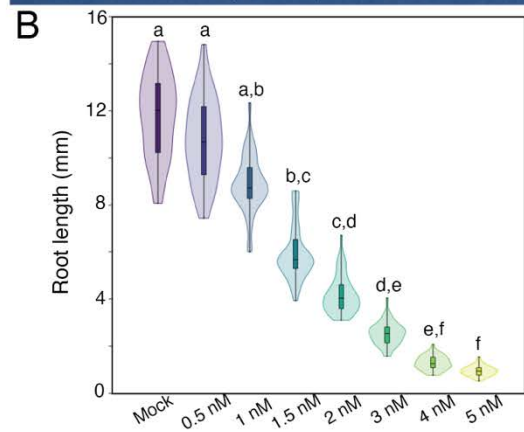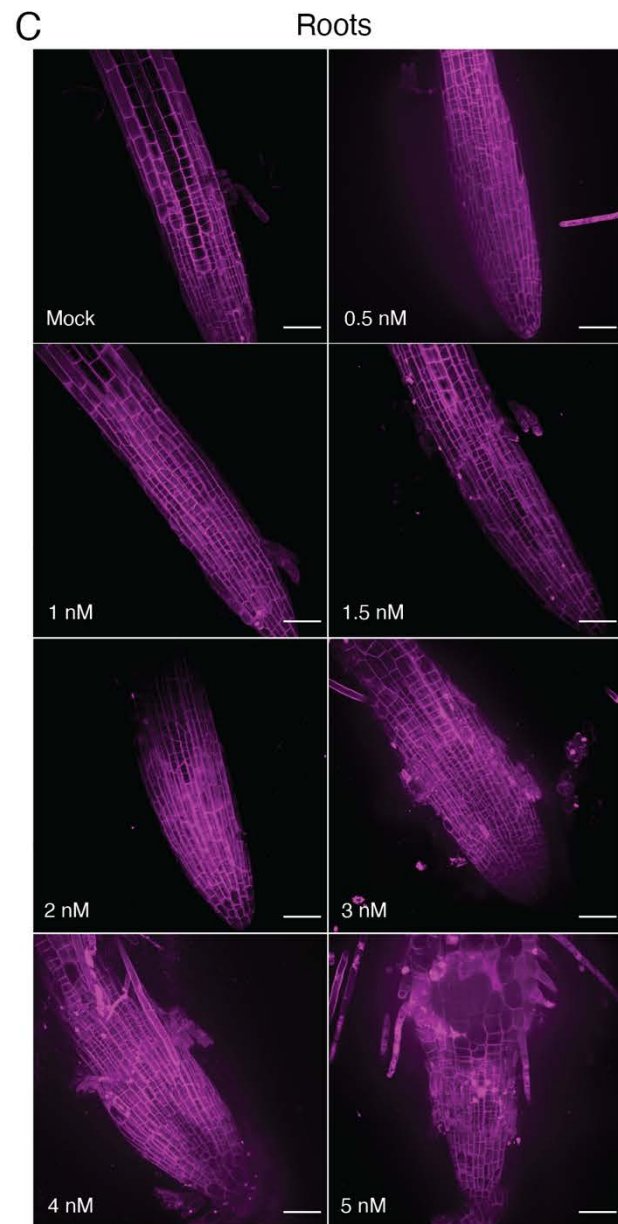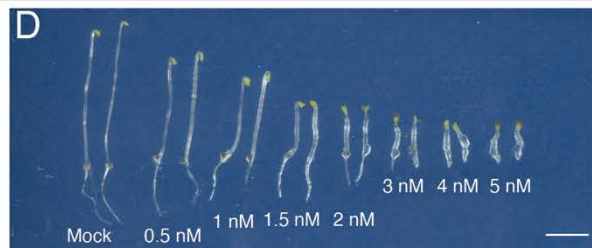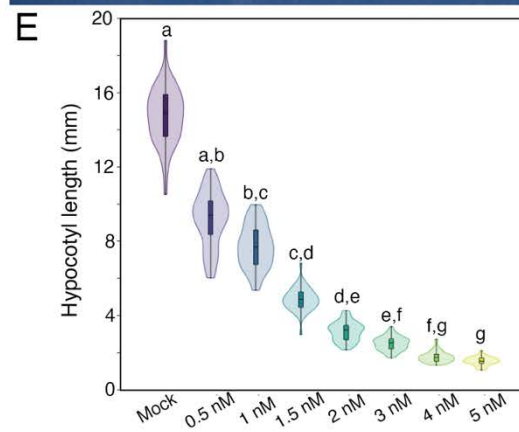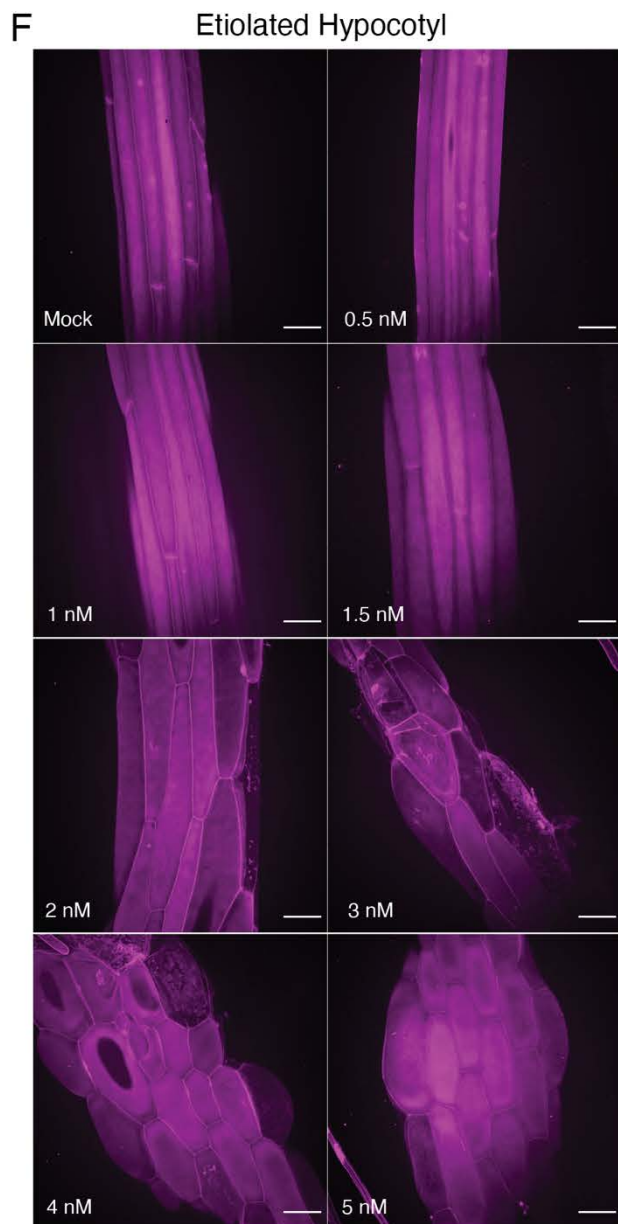

Fig. S2. Constitutive growth on ISX reduces root and hypocotyl growth and impacts tissue morphology. **A)** Representative image of 5-day-old Col-0 light-grown seedlings grown with varying concentrations of ISX. **B)** Quantification of root length. **C)** Maximum-projection images of ISX-treated roots following staining with PI. **D)** Representative image of 5-day-old Col-0 etiolated seedlings grown with varying concentrations of ISX. **E)** Quantification of hypocotyl length. **F)** Maximum-projection images of ISX-treated etiolated hypocotyls following staining with PI. Scale bars for A) and D) are 5 mm, and for C) and F) are 50  $\mu\text{m}$ .  $n=45$  seedlings/treatment for length assays combined from three independent experiments, and images are representative of 4 biological replicates. Letters indicate significantly different means using a one-way ANOVA with a Dunn's test with Bonferroni correction,  $P<0.05$ .

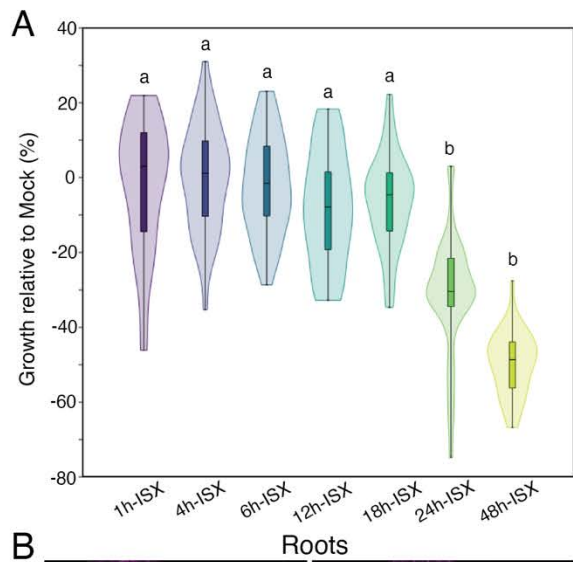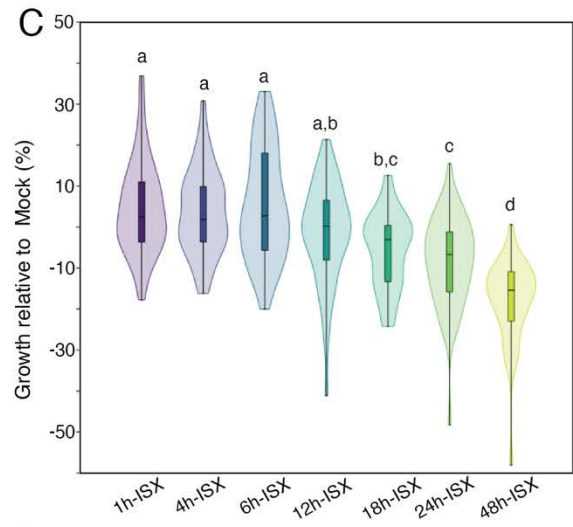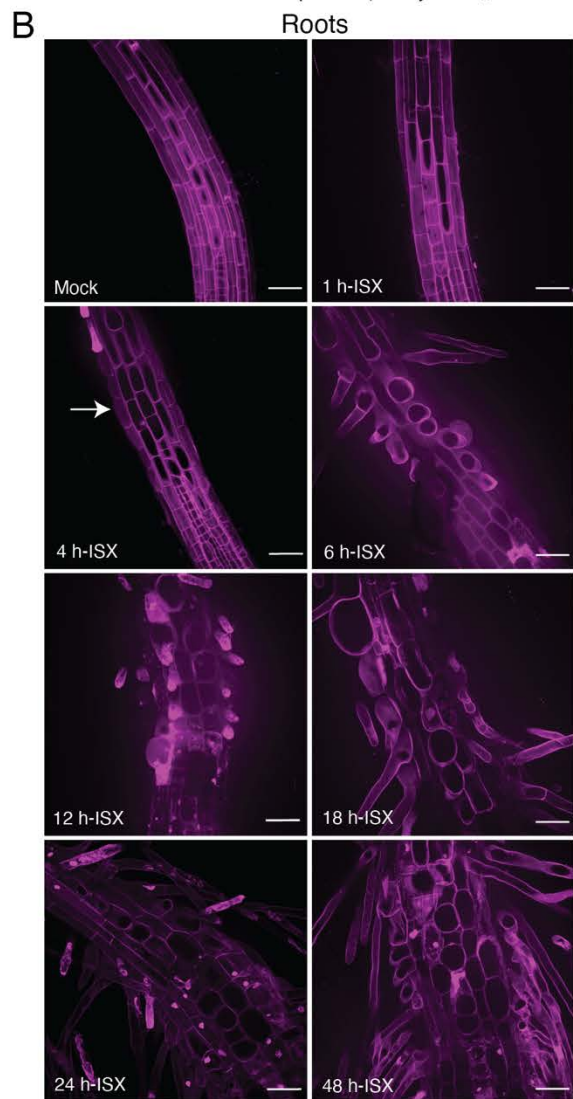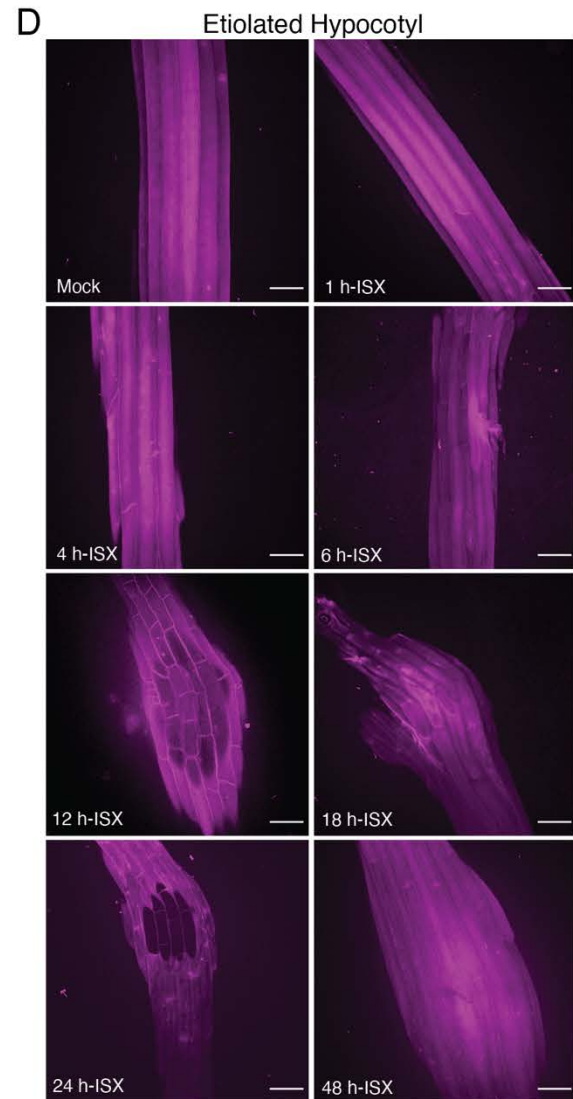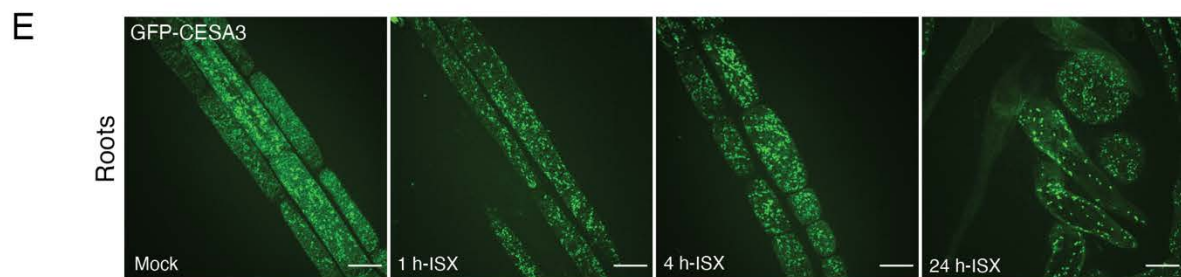

**Fig. S3.** Short-term treatment of 200 nM ISX impacts growth and cell morphology. Col-0 seedlings were grown for 5 days and then transferred to plates containing 200 nM ISX for the designated time. **A)** Quantification of root length, as a percentage of Mock-treated controls, following ISX treatment. Letters indicate significantly different means using a one-way ANOVA and a Dunn's test with Bonferroni correction,  $P < 0.05$ . **B)** Representative maximum-projection images of ISX-treated roots following staining with PI (magenta). White arrow denotes initial cell swelling. **C)** Quantification of hypocotyl length, as a percentage of Mock-treated controls, following ISX treatment. Letters indicate significantly different means using a one-way ANOVA with a Tukey's test,  $P < 0.0001$ . **D)** Representative maximum-projected images of ISX-treated etiolated hypocotyls following staining with PI (magenta). **E)** Single-frame PM-level images of CESA3-GFP (green) following ISX treatment in light-grown root elongation zone epidermal cells.  $n > 34$  seedlings/time course combined from three independent experiments for seedling length assays, and images are representative of 4 biological replicates. Scale bars for B) and D) are 50  $\mu\text{m}$  and for E) is 20  $\mu\text{m}$ .

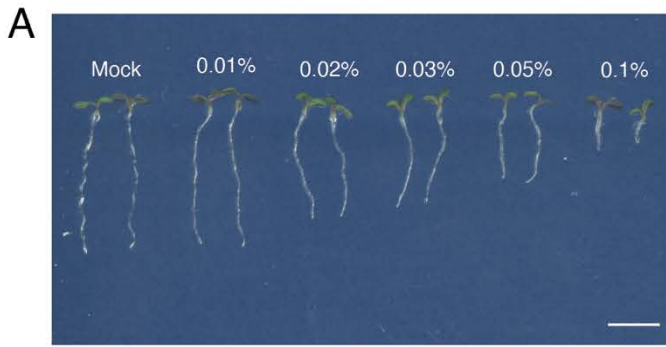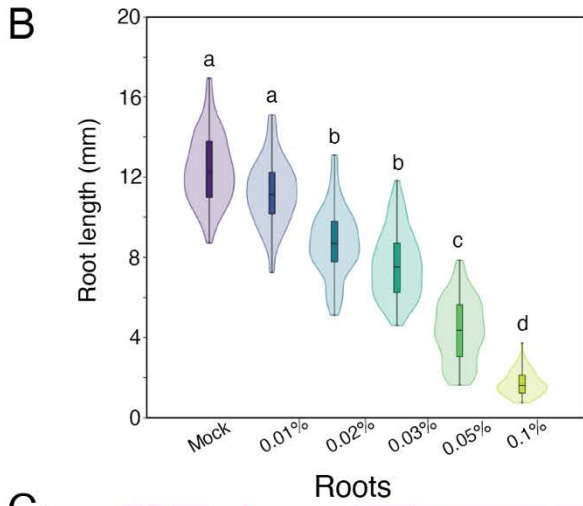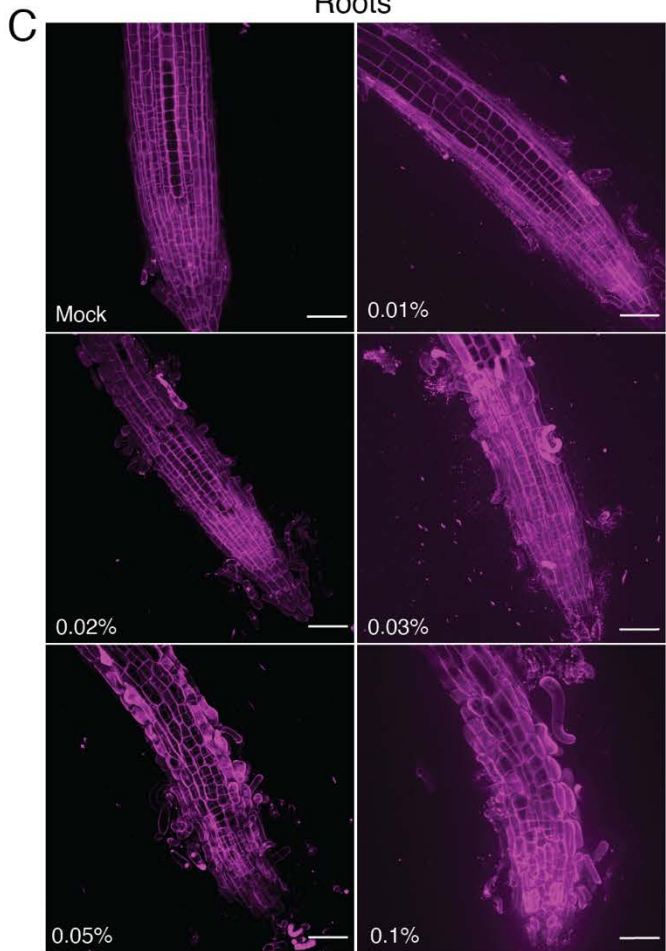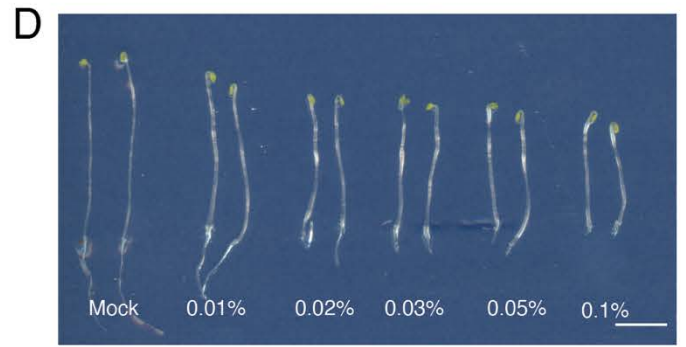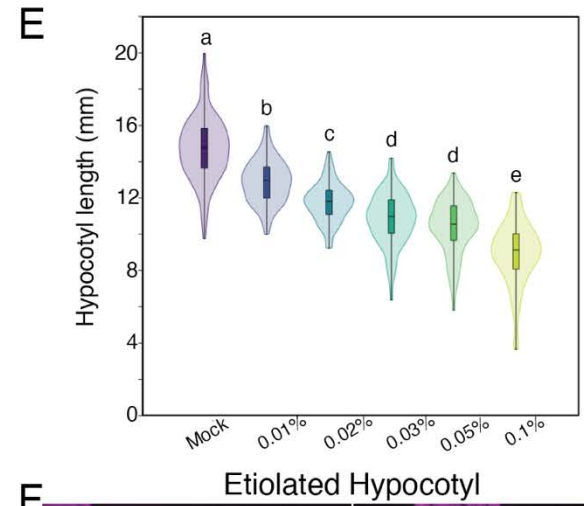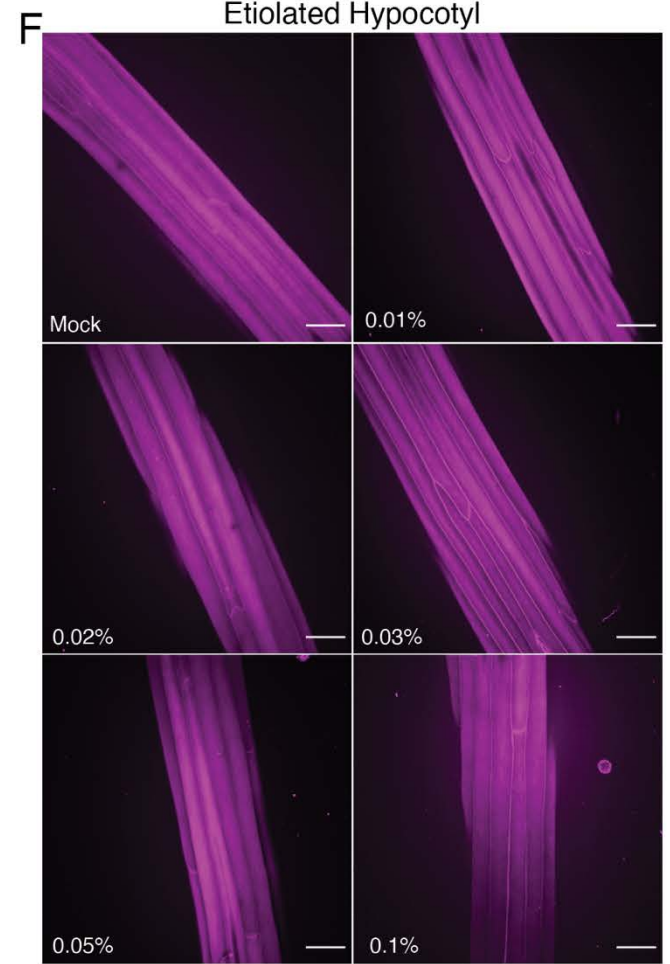

**Fig. S4.** Constitutive growth on Dri reduces growth and alters tissue morphology in light-grown roots. **A)** Representative image of 5-day-old Col-0 light-grown seedlings grown with varying concentrations of Dri, as indicated. **B)** Quantification of root length. **C)** Maximum-projection images of Dri-treated roots following staining with PI. **D)** Representative image of 5-day-old Col-0 etiolated seedlings grown with varying concentrations of Dri. **E)** Quantification of hypocotyl length. **F)** Maximum-projection images of Dri-treated etiolated hypocotyls following staining with PI.  $n=45$  seedlings/treatment for seedling length assays combined from three independent experiments and images are representative of 4 biological replicates. Scale bars for A) and D) are 5 mm, and for C) and F) are 50  $\mu\text{m}$ . Letters indicate significantly different means using a one-way ANOVA with a Dunn's test with Bonferroni correction,  $P<0.05$ .



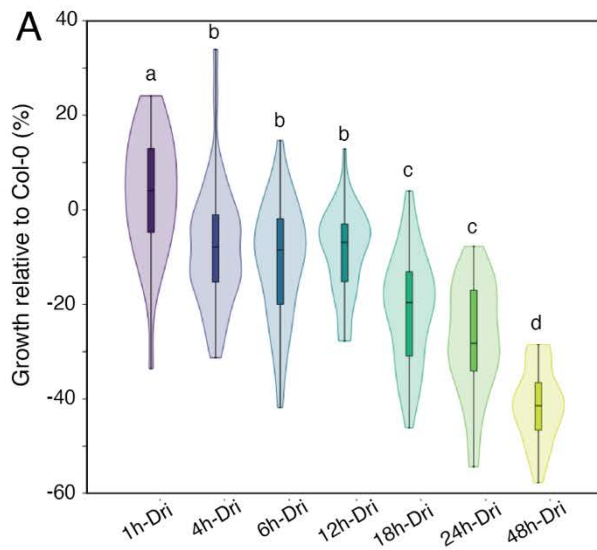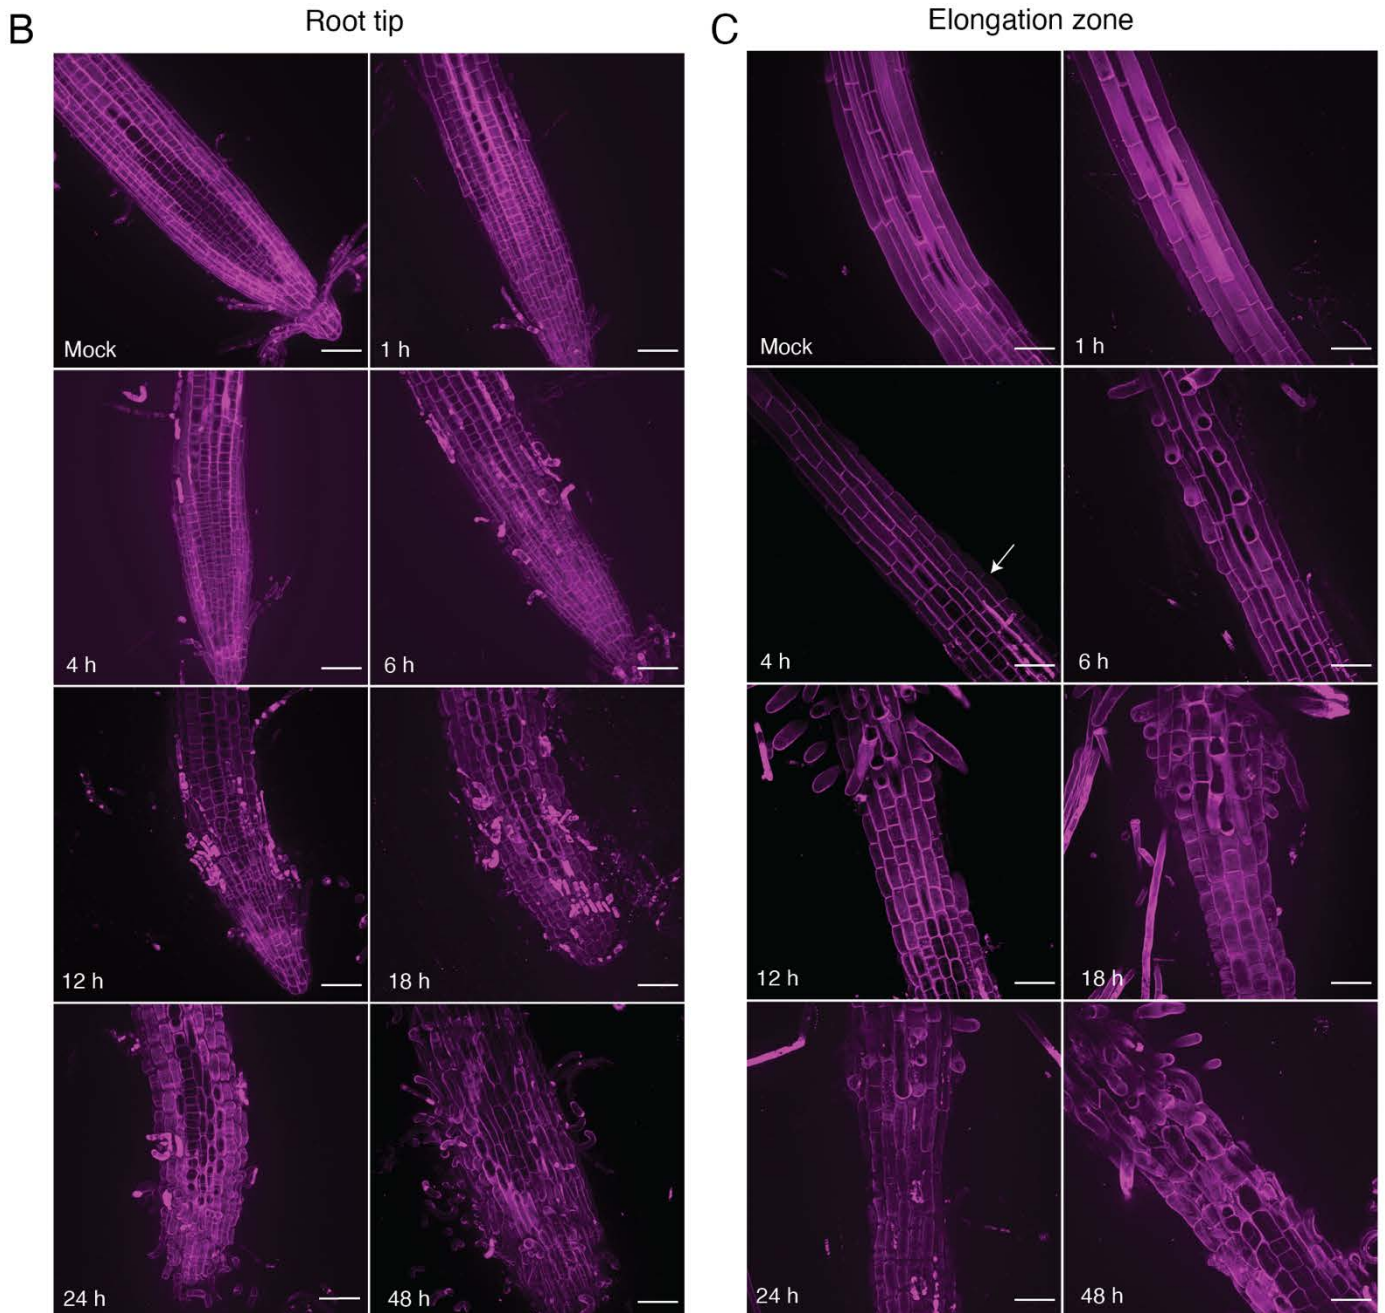

Fig. S5. Short-term treatment of 0.05% Dri impacts plant growth and cell morphology. Col-0 seedlings were grown for 5 days and then transferred to plates with 0.05% Dri for the designated time. **A)** Quantification of root length, as a percentage of Mock-treated controls, following Dri treatment. **B)** Representative maximum-projection images of the root tips of Dri-treated roots following staining with PI (magenta). **C)** Representative maximum-projection images of the elongation zone of Dri-treated roots following staining with PI (magenta). White arrow denotes initial cell swelling. Scale bars for B) and C) are 50  $\mu\text{m}$ .  $n > 34$  seedlings for seedling length assays combined from three independent experiments, and images are representative of four biological replicates. Letters indicate significantly different means using a one-way ANOVA with a Tukey's test,  $P < 0.001$ .

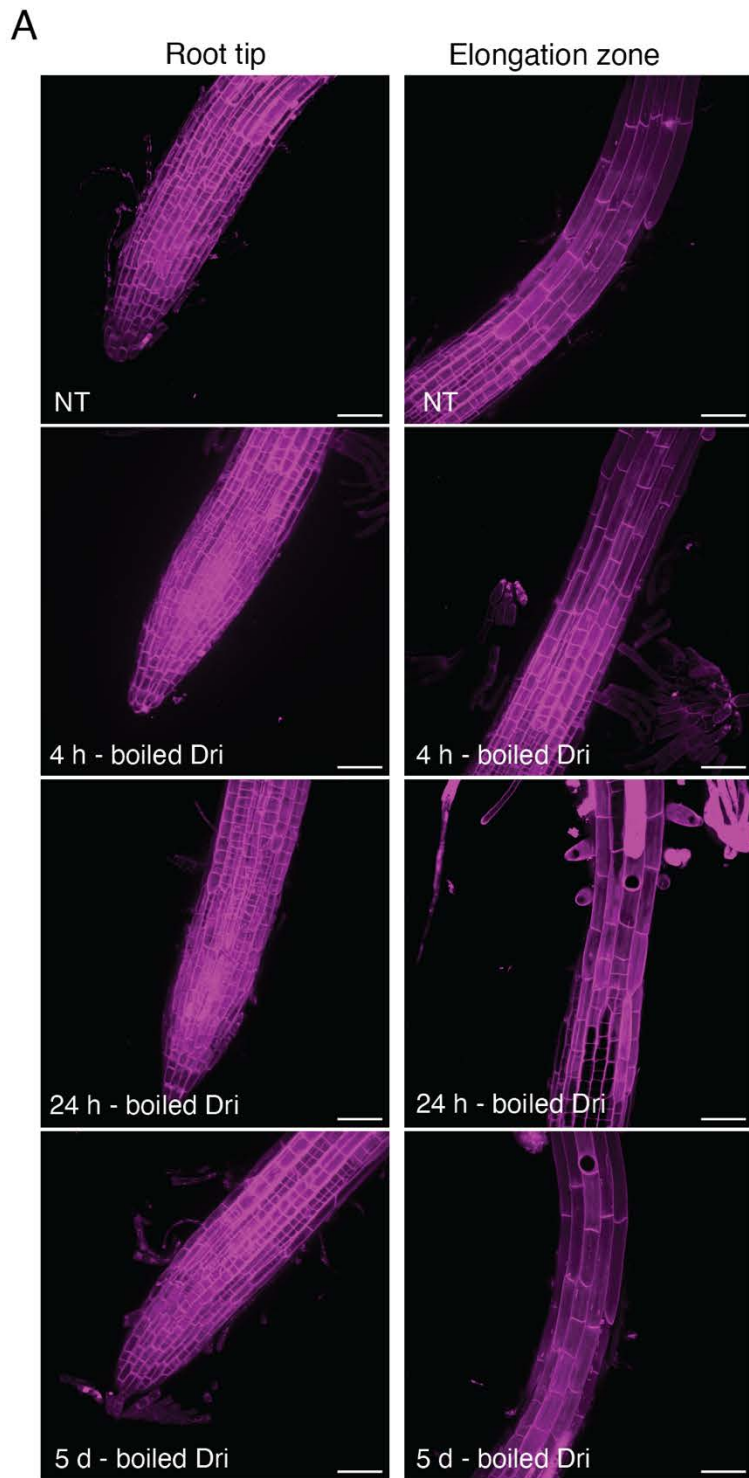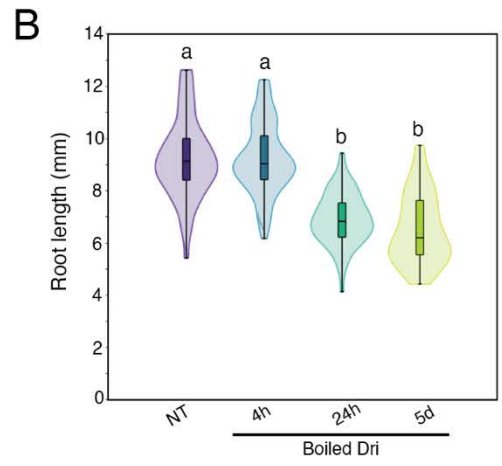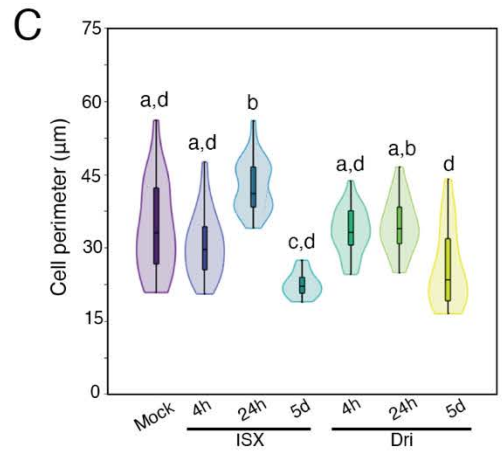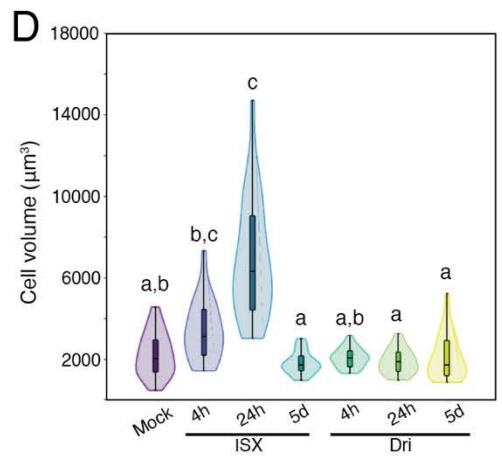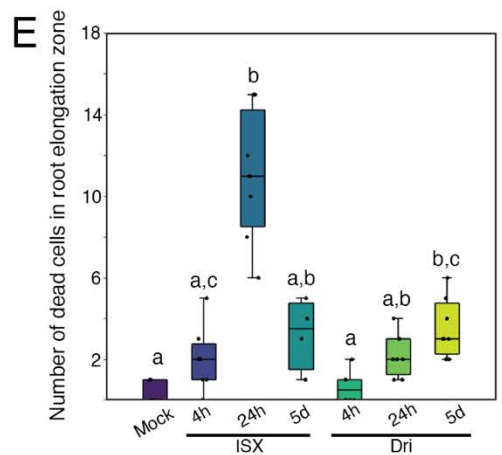

**Fig. S6.** ISX and Dri cause cell swelling, but heat-inactivated Dri has only minor effects. **A)** PI-stained 5-day-old light-grown roots treated with 0.05% Dri (4 h, 24 h) or 0.03% Dri (5 d) that has been boiled for 10 min. NT denotes no treatment. Images are representative of 3–4 biological replicates. **B)** Root length following no treatment (NT) or with boiled Dri.  $n > 53$  biological replicates/treatment. **C)** Cell perimeter for all ISX and Dri treatments.  $n > 16$  cells from 4–8 biological replicates. **D)** Cell volume for all ISX and Dri treatments.  $n > 16$  cells from 4–8 biological replicates. **E)** Number of dead cells in the root elongation zone for all ISX and Dri treatments.  $n > 4$  roots per treatment. Letters denote significantly different means using a one-way ANOVA with Dunn's *post hoc* test with Bonferroni correction,  $P < 0.05$ . Scale bars for A) are 50  $\mu\text{m}$ .

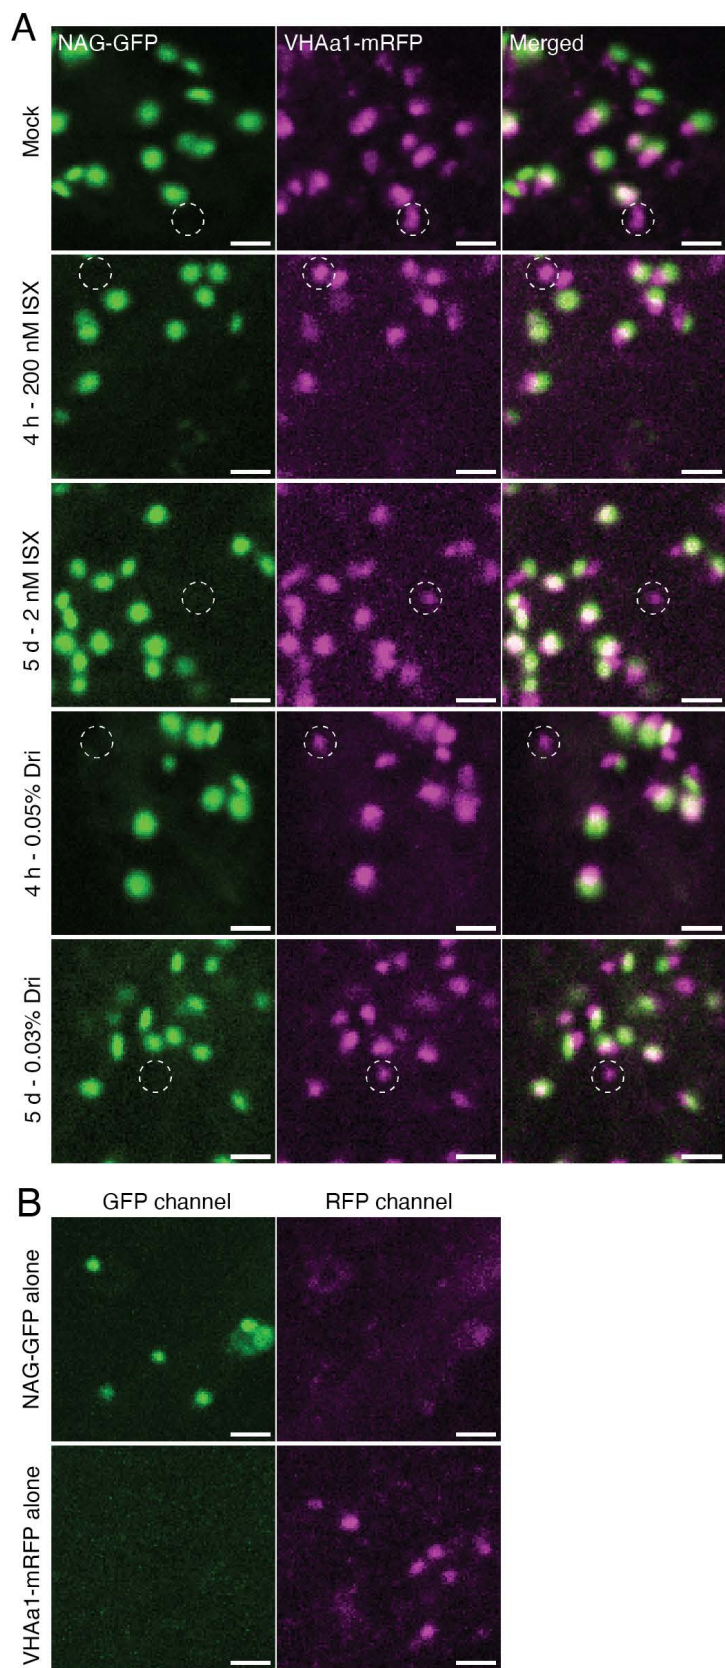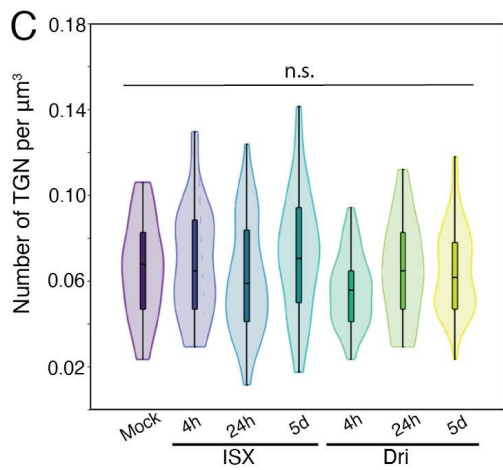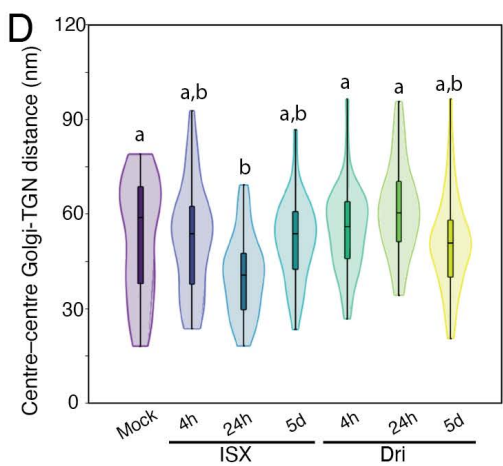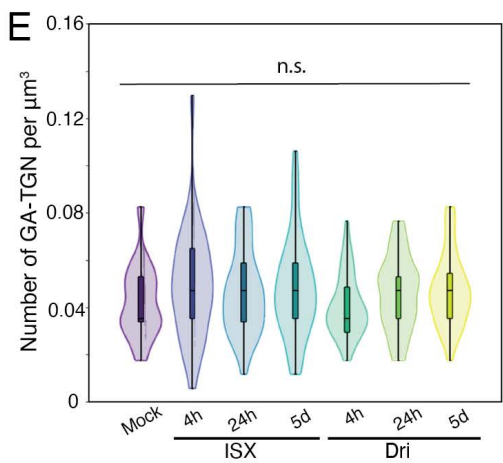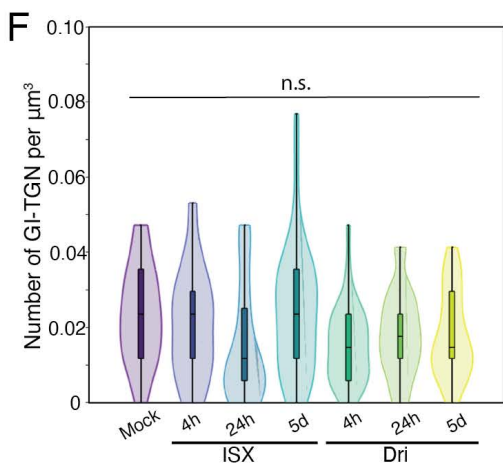

Fig. S7. Other time points and parameters examining impact of ISX or Dri on the Golgi and TGN. **A)** Representative maximum-projection images of 5-day-old Col-0 root elongation zone epidermal cells with the dual Golgi (green) and TGN (magenta) marker NAG-GFP/VHAa1-RFP. **B)** Controls for the simultaneous imaging of dual GFP-RFP fluorescence. Cells expressing either NAG-GFP or VHAa1-mRFP alone and bleed-through between GFP and RFP channels. **C)** Quantification of the total number of VHAa1-mRFP TGN per volume. **D)** Quantification of the distance between Golgi and TGN in 3D space. **E)** Quantification of the number of GA-TGN per volume. **F)** Quantification of the number of GI-TGN per volume. Letters represent statistically significant different means using a one-way ANOVA with a Dunn's test with Bonferroni correction,  $P < 0.05$ , while n.s. denotes not significant.  $n = 34$  regions of interest from each treatment from 12 biological replicates. Scale bars are 2  $\mu\text{m}$ .

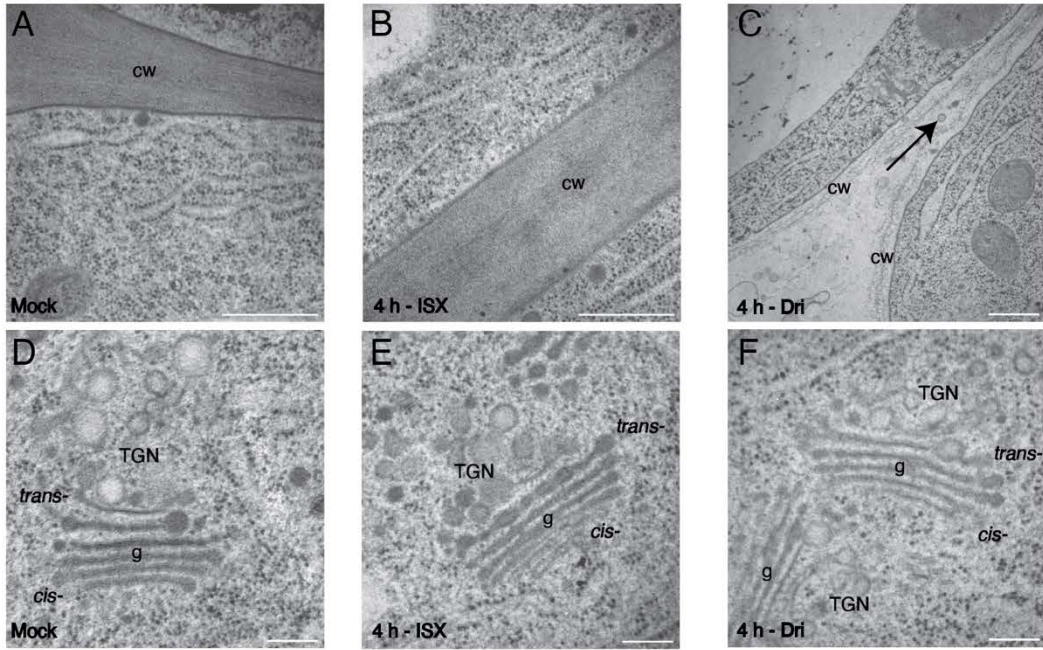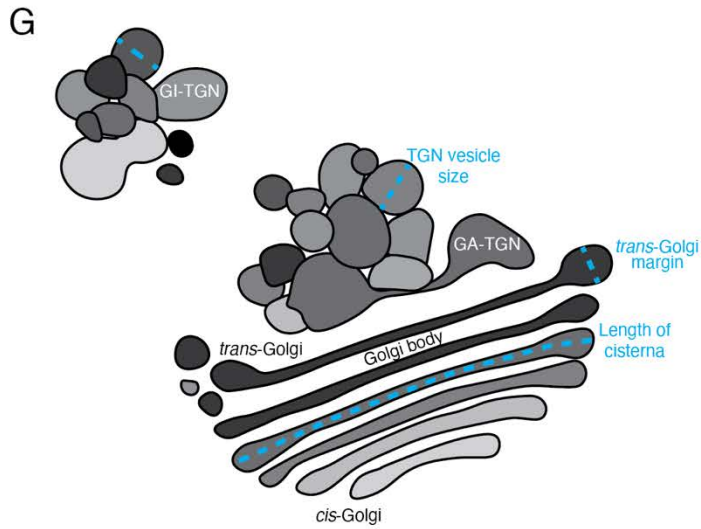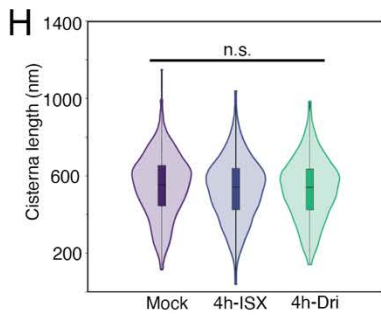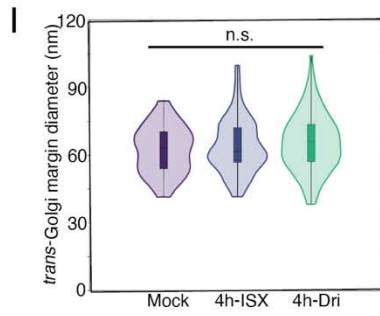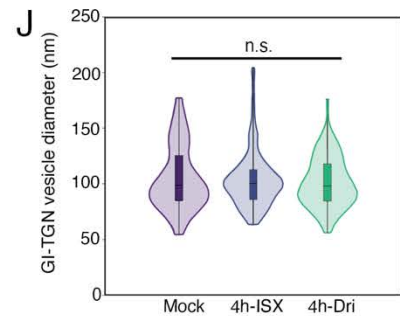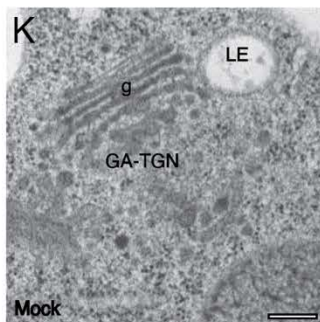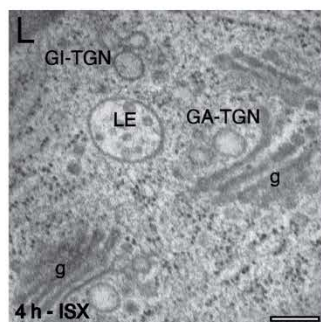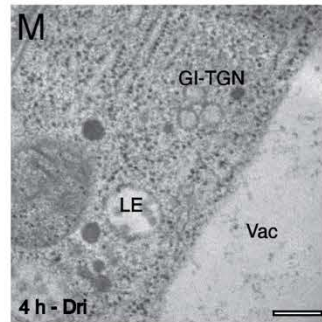

**Fig. S8.** Additional TEM images. 5-day-old Col-0 seedlings were treated with 200 nM ISX or 0.05% Dri for 4 h. **A–C)** TEM image of Mock (A), 4 h-ISX (B), and 4 h-Dri (C) high pressure-frozen root elongation zone epidermal cells. cw represents the cell wall. Black arrow in 4 h-Dri designates area of cell wall separation/digestion. **D–F)** Additional images of Golgi ultrastructure in Mock (D), 4 h-ISX (E), and 4 h-Dri (F). Golgi cisternae *cis*- and *trans*- are labelled; Golgi is denoted by a g. **G)** Model of a Golgi, GA-TGN, and GI-TGN and the different parameters used to quantify TEM ultrastructure. **H)** Quantification of Golgi cisterna length. **I)** Quantification of *trans*-Golgi margin diameter. **J)** Quantification of GI-TGN vesicle diameter.  $n=80, 97,$  and  $134$  Golgi from Mock, 4 h-ISX, and 4 h-Dri, respectively, and  $n=83, 123,$  and  $182$  TGN from Mock, 4 h-ISX, and 4 h-Dri, respectively, from 3 biological replicates. n.s. represents no significant differences between means using a one-way ANOVA,  $P>0.05$ . **K–M)** Additional TEM images showing late endosomes (LEs) in Mock (K), 4 h-ISX (L), or 4 h-Dri (M). Scale bars are 200 nm.



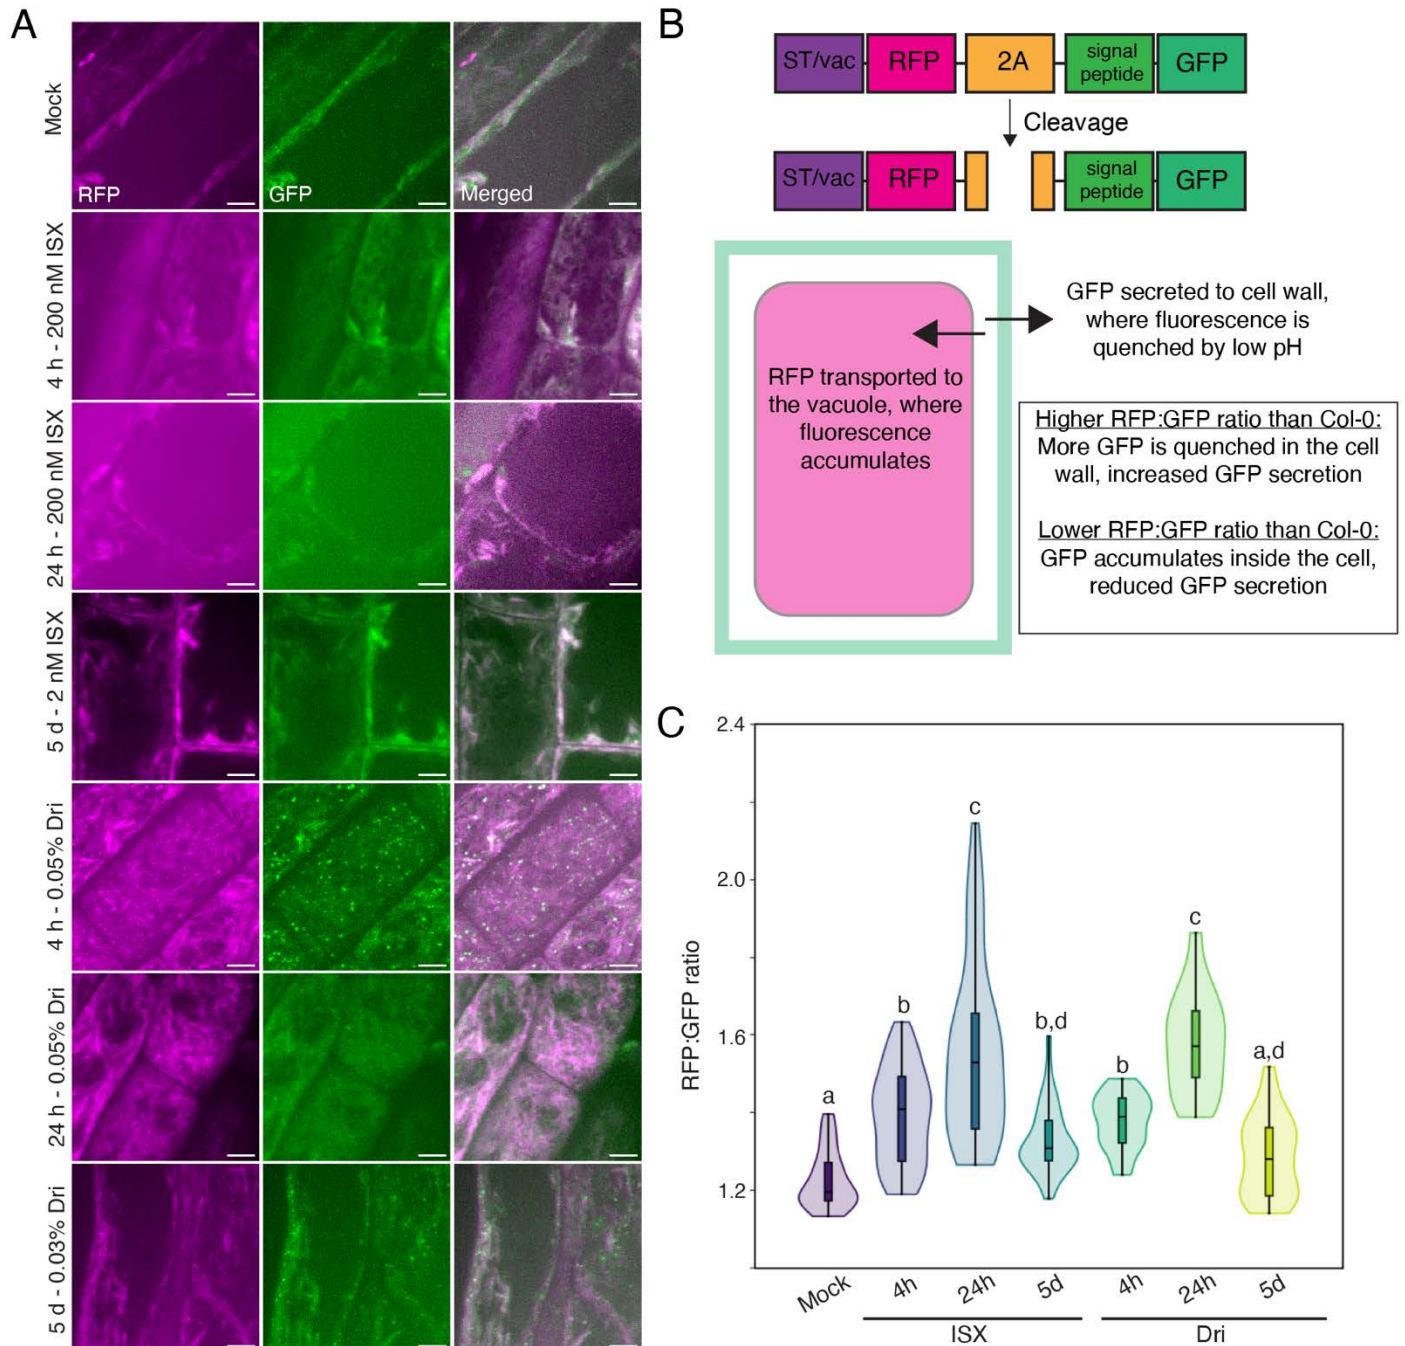

**Fig. S9.** ISX and Dri treatment impact secretion to the apoplast. **A)** Representative maximum-projection images of ratiometric-secGFP in 5-day-old root elongation zone epidermal cells. Scale bars are 2  $\mu\text{m}$ . **B)** Overview of the ratiometric-secGFP construct (Samalova *et al.*, 2006). RFP and GFP fluorescent proteins are connected by a self-cleaving 2A protein, which separates vacuole-targeted RFP (indicative of total protein synthesis), from apoplast-targeted GFP. In the cell wall, GFP fluorescence is quenched by the low pH. The RFP:GFP ratio can provide quantitative data on the secretion of GFP. **C)** Quantification of RFP:GFP ratio. Letters represent significantly different means using a one-way ANOVA with a Tukey's test,  $P < 0.01$ .  $n = 36$  regions of interest from 6 biological replicates.

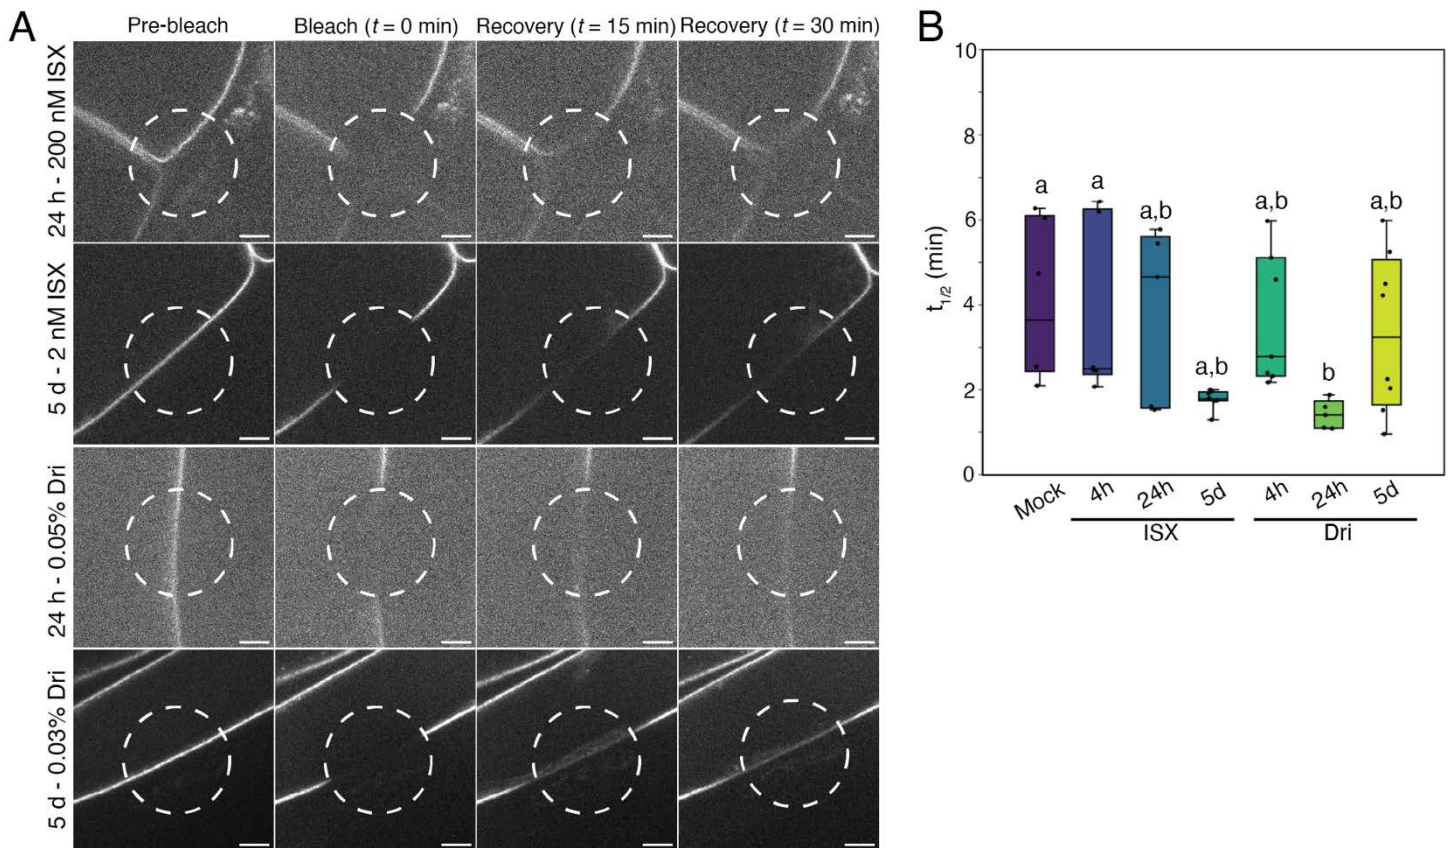

**Fig. S10.** Additional data for PIP2A-GFP FRAP. **A)** Representative images of pre-bleach, bleach, and 15–30 min recovery of PIP2A-GFP fluorescence (white) in 5-day-old root elongation zone epidermal cells. Bleached region is outlined in dashed white circle. Scale bars are 5  $\mu$ m. **B)**  $t_{1/2}$  recovery time, the time at which fluorescence reaches half the plateau value, for PIP2A-GFP in cells after bleaching.  $n > 5$  regions of interest from 5 biological replicates. Letters indicate significantly different means using a one-way ANOVA with a Dunn's *post hoc* test with Bonferroni correction,  $P < 0.05$ .

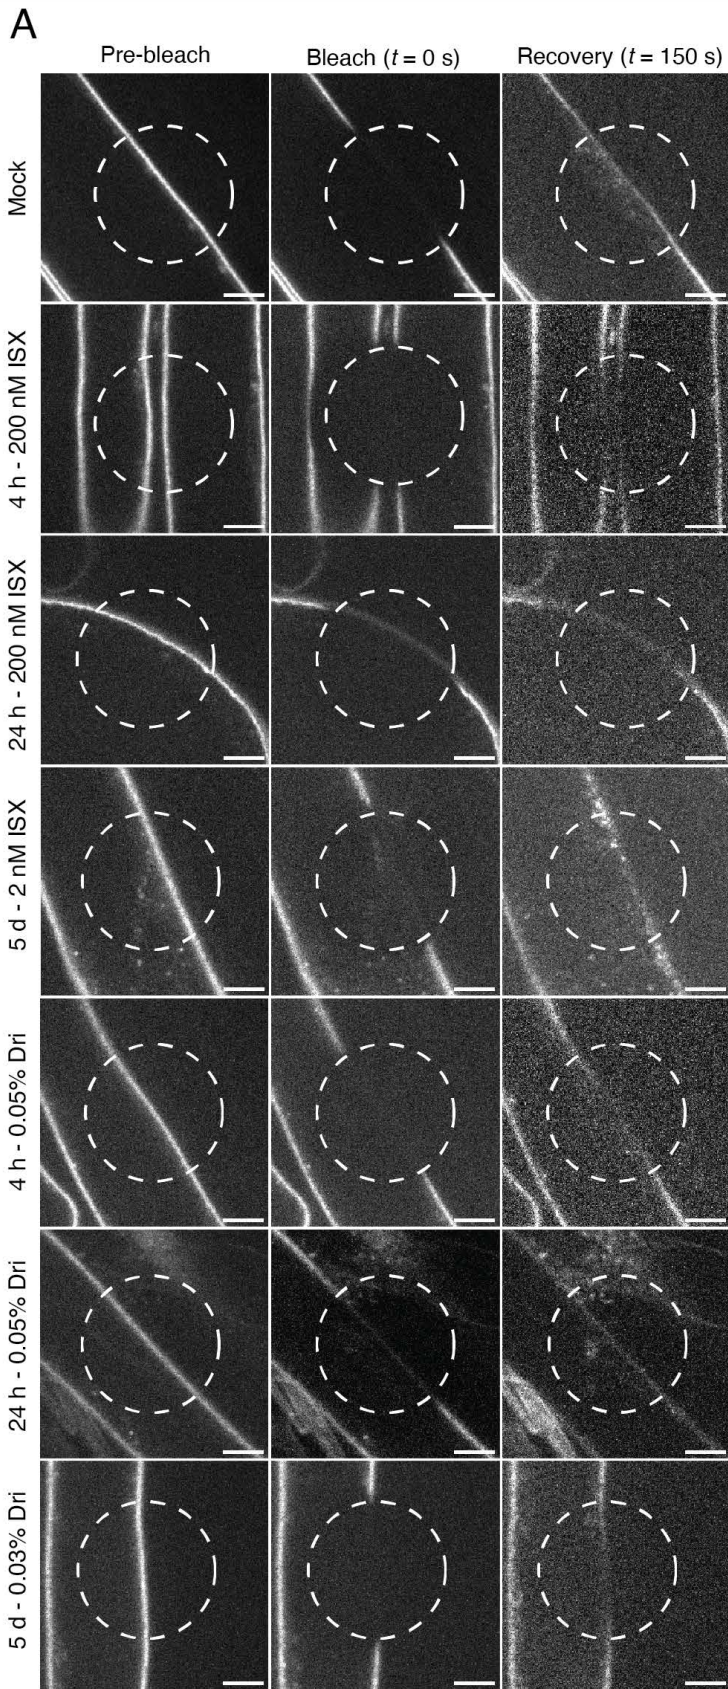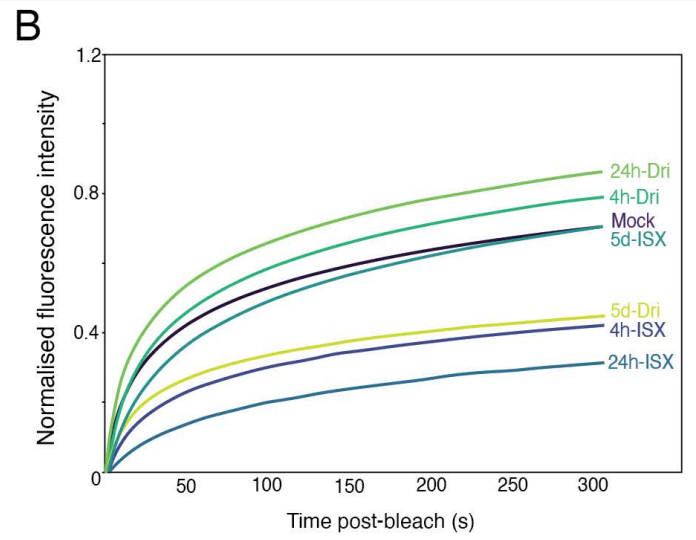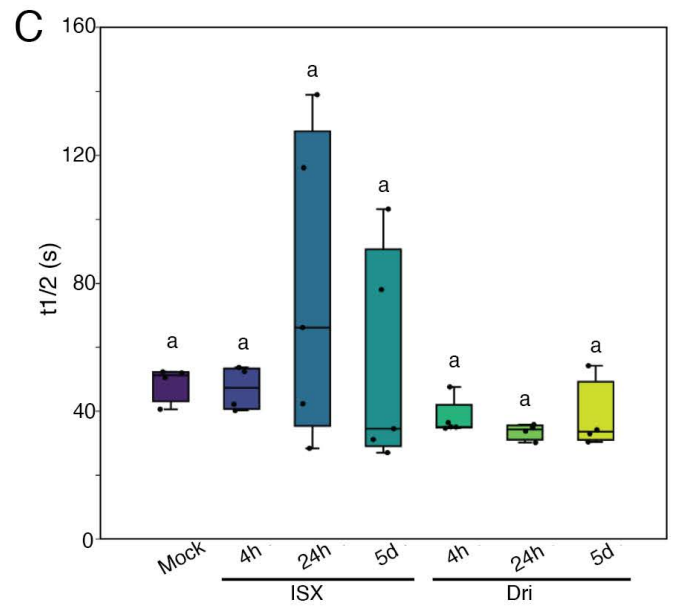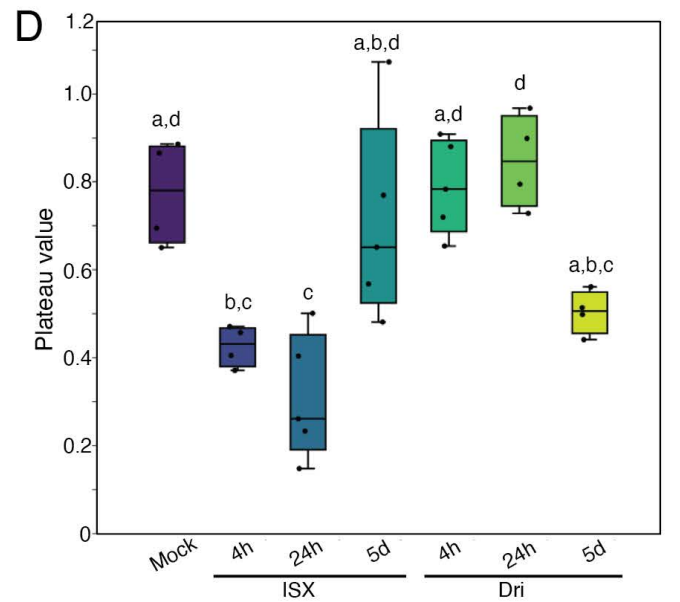

Fig. S11. LTI6B-GFP FRAP following ISX or Dri treatment. **A)** Representative images of pre-bleach, bleach, and recovery (150 s) of LTI6B-GFP fluorescence (white) in 5-day-old root elongation zone epidermal cells. Bleached region is outlined in dashed white circle. Scale bars are 5  $\mu\text{m}$ . **B)** Mean fluorescence recovery curves of LTI6B-GFP following bleaching. **C)**  $t_{1/2}$  recovery time, the time at which fluorescence reaches half the plateau value, for LTI6B-GFP in cells after bleaching. **D)** Plateau value, the fluorescence amount that the FRAP curve levels off, for LTI6B-GFP following bleaching. Data is normalised to pre-bleach values.  $n > 4$  regions of interests from 4 biological replicates. Means were compared using a one-way ANOVA with Tukey test,  $P < 0.05$ .

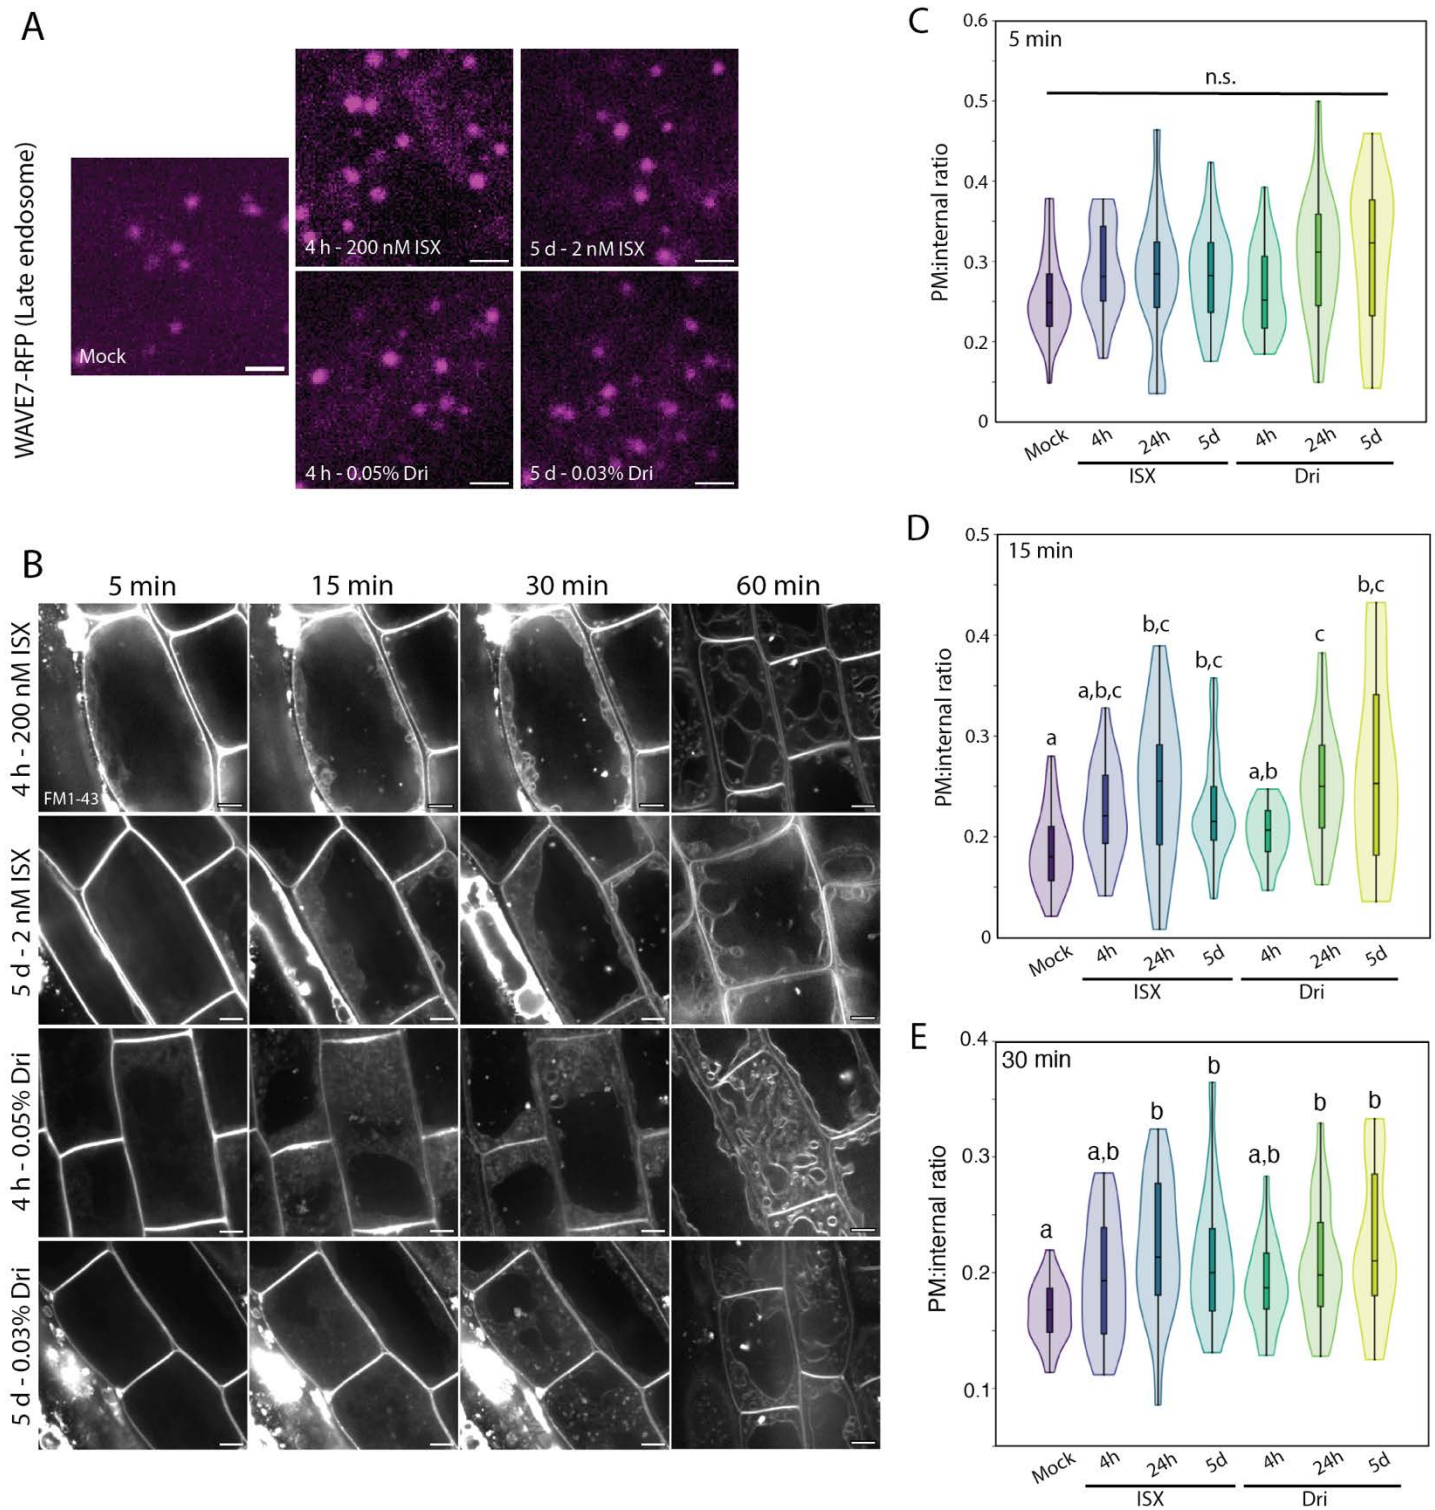

**Fig. S12.** Additional time points for LE size and number, and endocytic trafficking of FM1-43. **A)** Representative maximum-projection images of WAVE7-RFP LEs in 5-day-old root elongation zone epidermal cells. **B)** Representative single-frame images of FM1-43 endocytosis after 5, 15, 30, or 60 min. Images from 5–30 min represent the same cell over a time progression, while images at 60 min represent different roots. **C–E)** Quantification of PM:internal ratio of FM1-43 after 5 min (C), 15 min (D), or 30 min (E) of endocytic trafficking.  $n=17-24$  cells from 6 biological replicates. Letters represent significantly different means using a one-way ANOVA and Dunn's *post hoc* test with Bonferroni correction,  $P<0.05$ , while n.s. denotes not significant. Scale bars are 2  $\mu\text{m}$  for A) and 5  $\mu\text{m}$  for B).

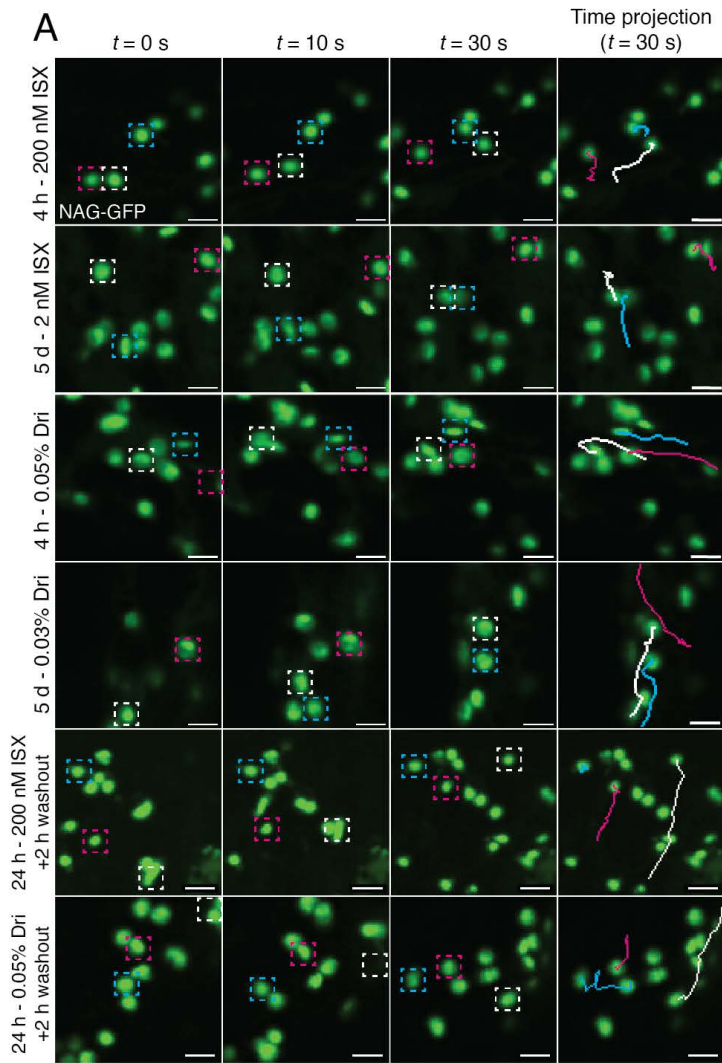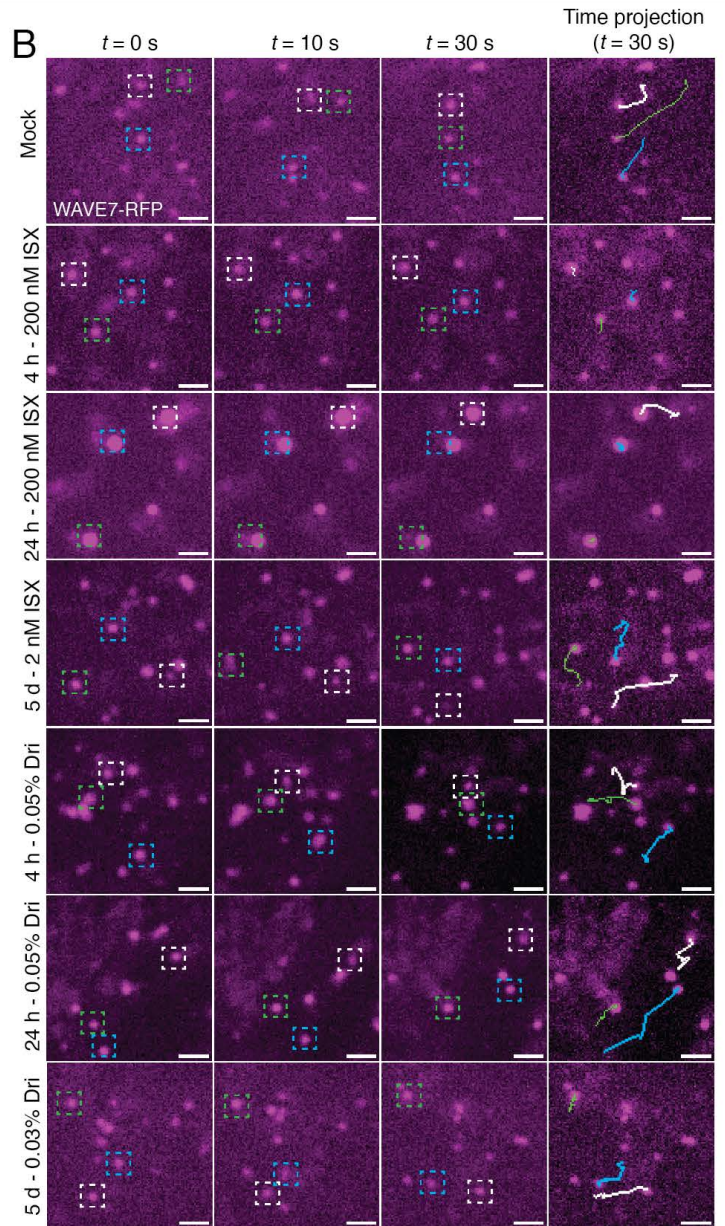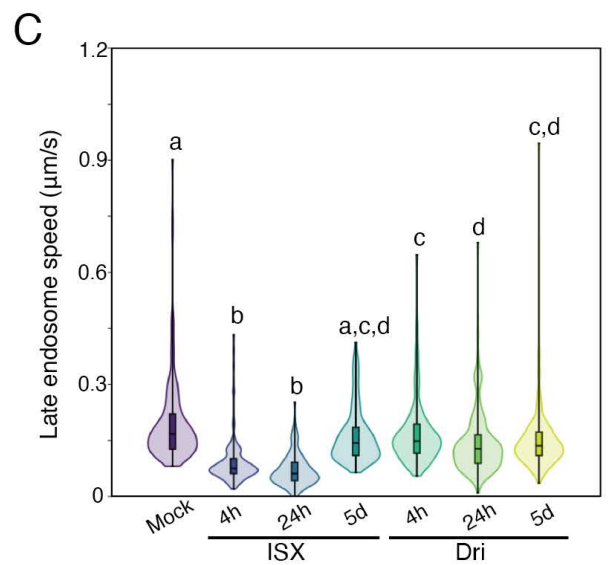

Fig. S13. Additional time points for movement of Golgi and measurements of LE speed following ISX or Dri treatment. **A)** Representative maximum-projection images from timelapses of Golgi (NAG-GFP; green) in 5-day-old root elongation zone epidermal cells. Three representative Golgi are tracked for 30 s and are indicated by white, magenta, or blue boxes. The final images show a line trace of the movement of the Golgi over 30 s. **B)** Representative maximum-projection images from timelapses of LEs (WAVE7-RFP; magenta) in 5-day-old root elongation zone epidermal cells. Three representative LEs are tracked for 30 s and are indicated by white, green, or blue boxes. The final images show a line trace of the movement of the LE over 30 s. **C)** Quantification of LE speed. Letters represent significantly different means using a one-way ANOVA with a Tukey's test,  $P < 0.01$ .  $n = 36$  regions of interest/treatment, from 6 biological replicates. Scale bars are 2  $\mu\text{m}$ .

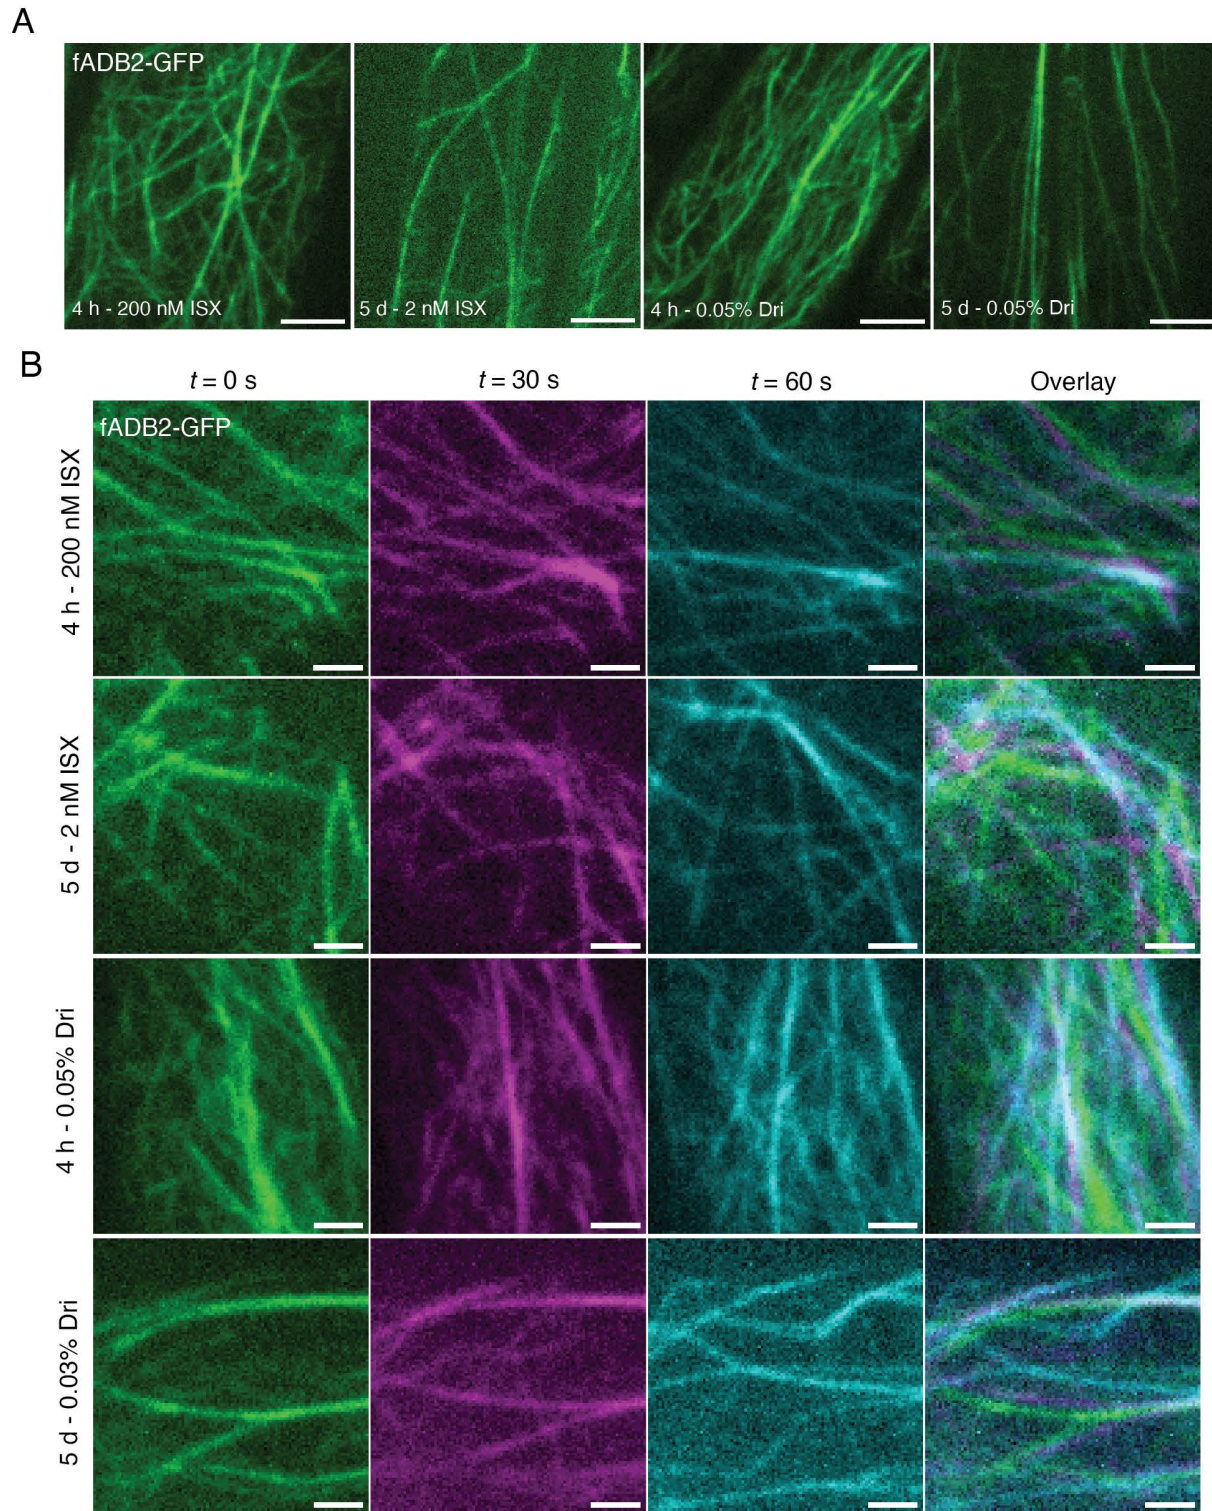

**Fig. S14.** Additional images for cortical actin organization and dynamics following ISX or Dri treatment. **A)** Representative maximum-projection images of 5-day-old root elongation zone epidermal cells from fADB2-GFP. **B)** Representative maximum-projection images of fADB2-GFP actin filaments at 0 s (green), 30 s (magenta), and 60 s (cyan), with overlaid image from 5-day-old root elongation zone epidermal cells. The amount of overlap of the three colours indicates the degree of actin dynamics over 60 s. Scale bars are 5  $\mu$ m for A) and 2  $\mu$ m for B).



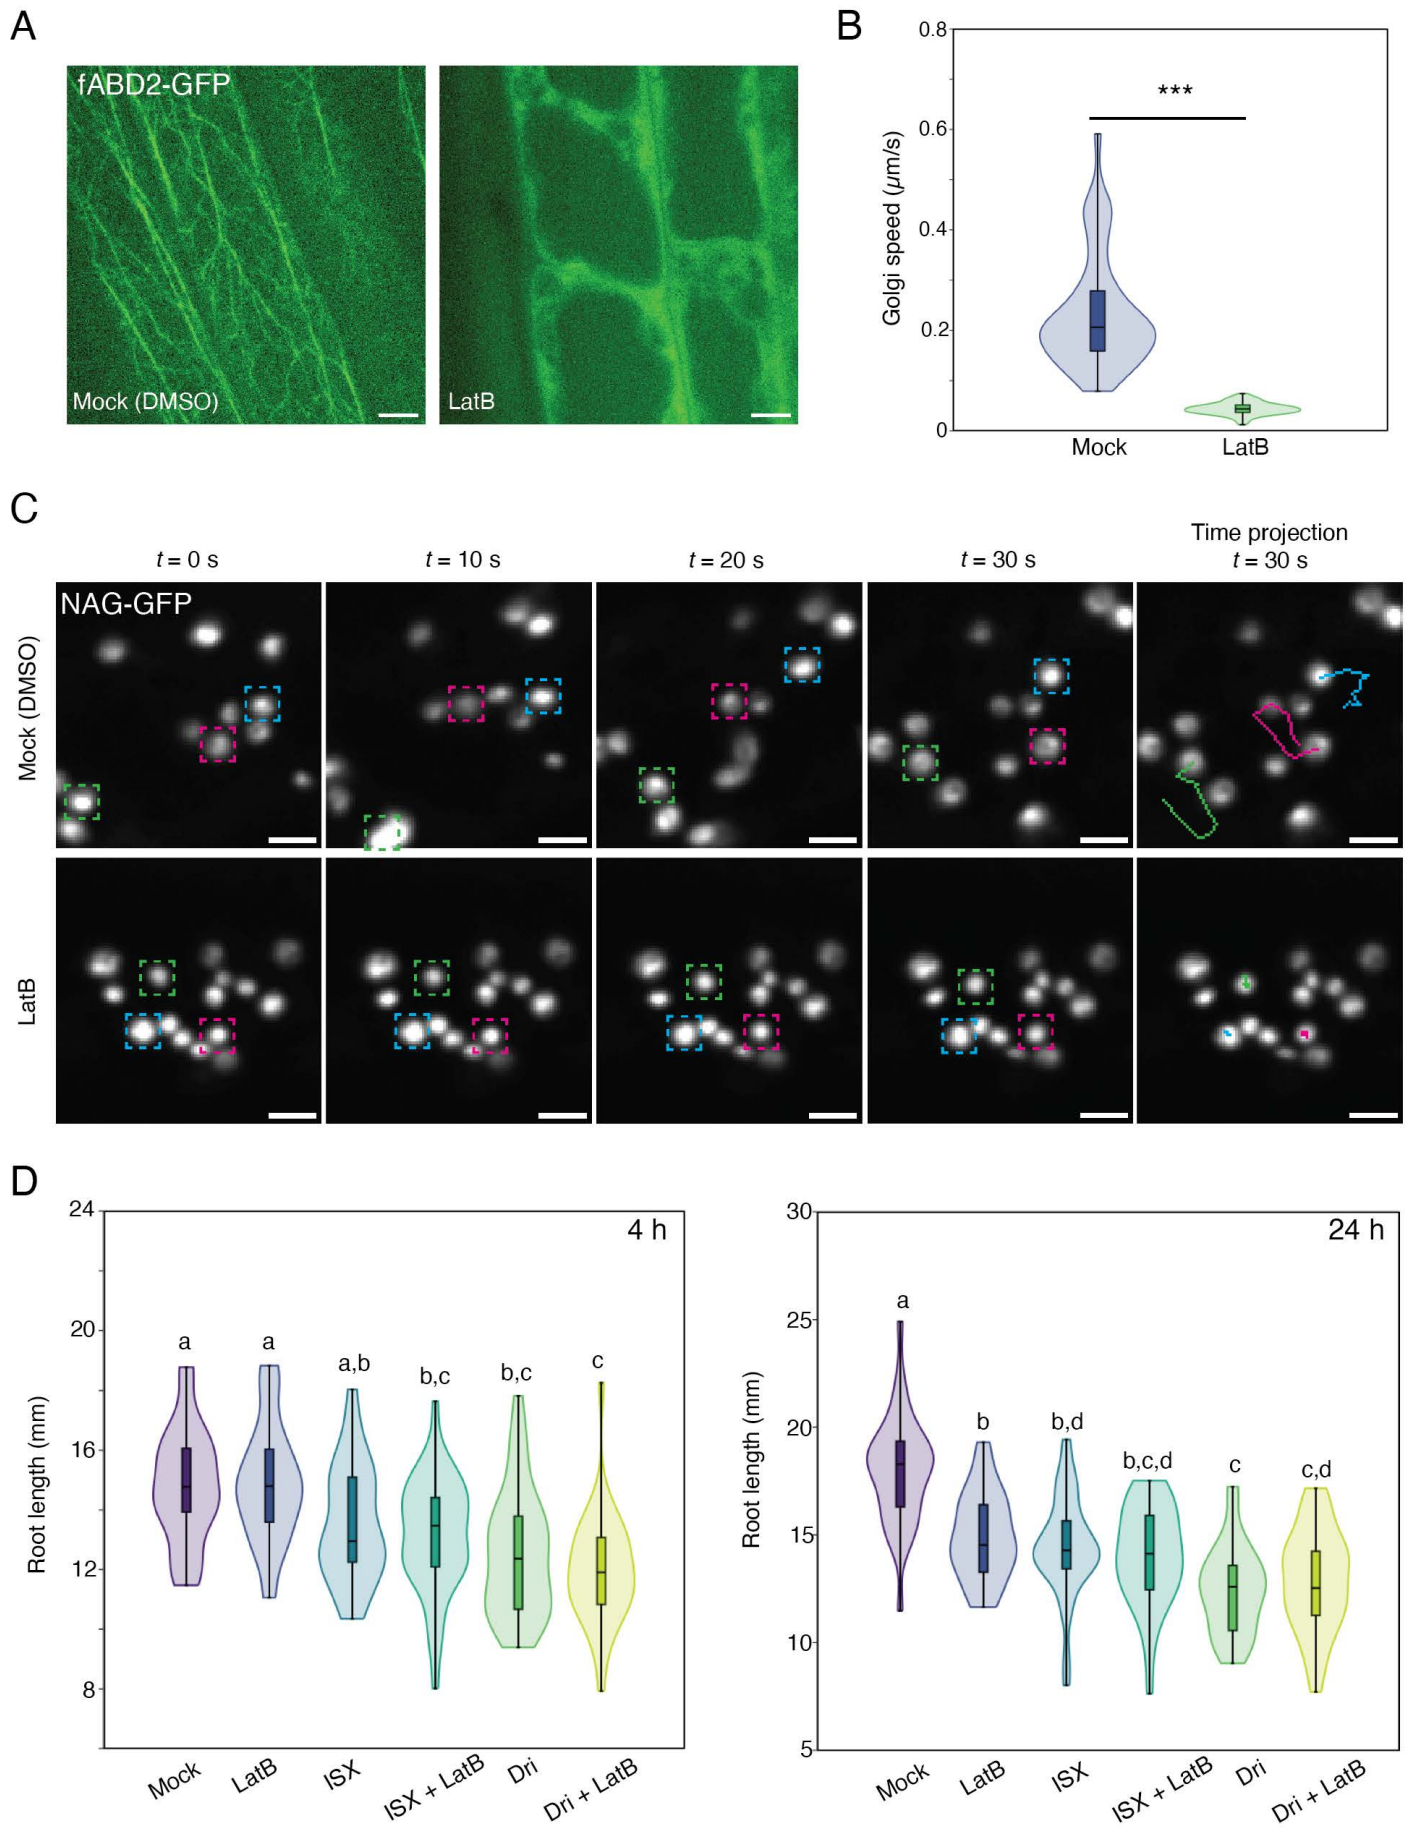

**Fig. S15.** LatB depolymerizes actin filaments, reduces Golgi speed, and impacts plant growth, but does not exacerbate cell wall integrity signalling-induced phenotypes. **A)** Representative maximum-projection images of 5-day-old fABD2-GFP roots that were either Mock-treated (DMSO) or treated with LatB for 1 h. **B)** Quantification of Golgi (NAG-GFP) speed in 5-day-old Mock- or LatB-treated 5-day-old root elongation zone epidermal cells after 1 h.  $n=86$  Golgi from 13 biological replicates. Asterisks represent significantly different means using a  $t$ -test,  $p<0.001$ . **C)** Representative maximum-projection images of NAG-GFP Golgi (white) in 5-day-old Mock- or LatB-treated root elongation zone epidermal cells after 1 h. Time lapse follows three selected Golgi (green, magenta, and blue boxes) for 30 s, with the time projection showing Golgi movement across the 30 s. **D)** Quantification of 5-day-old root length following 4 h or 24 h treatment with 200 nM ISX or 0.05% Dri alone, or in combination with 25  $\mu$ M LatB.  $n>30$  roots/treatment combined from three independent experiments. Letters represent significantly different means using a one-way ANOVA and a Tukey's test,  $P<0.05$ . Scale bars are 5  $\mu$ m for A) and 2  $\mu$ m for C).

Supplementary Table S1. Fluorescent lines used for imaging.

| <b>Plant line</b>                           | <b>Marker</b>                            | <b>Reference</b>                                            |
|---------------------------------------------|------------------------------------------|-------------------------------------------------------------|
| prCESA3::CESA3-GFP                          | CELLULOSE SYNTHASE3                      | Desprez <i>et al.</i> , 2007                                |
| pr35S::NAG-GFP/<br>prVHAa1::VHAa1-mRFP      | Golgi/TGN                                | Grebe <i>et al.</i> , 2003;<br>Dettmer <i>et al.</i> , 2006 |
| prUBQ10::WAVE7-RFP                          | Late endosome (RabF2b)                   | Geldner <i>et al.</i> , 2009                                |
| pr35S::LTI6B-GFP                            | PM                                       | Cutler <i>et al.</i> , 2000                                 |
| pr35S::PIP2A-GFP                            | PM                                       | Cutler <i>et al.</i> , 2000                                 |
| pr35S::ST-N-Rm-2A-<br>secGFP (Ratiosec-GFP) | Ratiometric vacuolar<br>RFP/secreted GFP | Samalova <i>et al.</i> ,<br>2006                            |
| pr35S::GFP-fABD2                            | Actin filaments                          | Sheahan <i>et al.</i> , 2004                                |
